# Supplementary material for: Diarylferrocene tweezers for cation binding
Source: Royal Society of Chemistry journal article supplement (doi:10.1039/c5cp04530d), 2015-01-01
Supplement: c5cp04530d1.pdf [file c5cp04530d1.pdf]

## *Diarylferrocene Tweezers for Cation Binding*

# **(Supplementary Information)**

**Carlos F. R. A. C. Lima,<sup>\*a,b</sup> Ana M. Fernandes,<sup>b</sup> André Melo,<sup>c</sup> Luís M. Gonçalves,<sup>c</sup> Artur  
M. S. Silva<sup>b</sup> and Luís M. N. B. F. Santos<sup>\*a</sup>**

<sup>a</sup> CIQ, Departamento de Química e Bioquímica, Faculdade de Ciências da Universidade do Porto, P-4169-007 Porto, Portugal.

<sup>b</sup> Department of Chemistry & QOPNA, University of Aveiro, P-3810-193 Aveiro, Portugal.

<sup>c</sup> REQUIMTE, Departamento de Química e Bioquímica, Faculdade de Ciências da Universidade do Porto, P-4169-007 Porto, Portugal.

\* Corresponding authors:

Carlos F. R. A. C. Lima, Luís M. N. B. F. Santos

CIQ, Departamento de Química e Bioquímica, Faculdade de Ciências da Universidade do Porto, P-4169-007 Porto, Portugal.

E-mail: [carlos.chemistry@gmail.com](mailto:carlos.chemistry@gmail.com), [lbsantos@fc.up.pt](mailto:lbsantos@fc.up.pt)

### **Contents**

|                                                         |            |
|---------------------------------------------------------|------------|
| <b>Section S1. Synthesis and characterization</b> ..... | <b>S1</b>  |
| <b>Section S2. Mass spectrometry analysis</b> .....     | <b>S10</b> |
| <b>Section S3. Quantum chemistry calculations</b> ..... | <b>S12</b> |

## **Section S1. Synthesis and characterization**

**1.1. General remarks.** Ferrocene, 1-bromoferrocene, 1,1'-dibromoferrocene, all the boronic acids, and Pd(OAc)<sub>2</sub> were commercially obtained from Sigma-Aldrich. The <sup>1</sup>H and <sup>13</sup>C NMR spectra in solution were recorded on a Bruker Avance 300 spectrometer (300.13 MHz), using TMS as internal reference and CDCl<sub>3</sub> as the solvent. Reaction yields (%) are calculated from the mass of isolated product obtained, corrected for the sample %(*m/m*) purity. All purity analyses were made by GC, using an HP 4890 apparatus equipped with an HP-5 column, cross-linked, 5% diphenyl and 95% dimethylpolysiloxane. <sup>1</sup>H NMR data is given as: chemical shift (number of protons, multiplicity, atom numbering/identification, coupling constant).

**1.2. General synthesis of 1-arylferrocenes (1a–d).** A solution of K<sub>2</sub>CO<sub>3</sub> (1.4 mol/equiv) in 12 ml of water per 1 mmol of the limiting reactant was added to a solution of 1-bromoferrocene (1 mol/equiv), arylboronic acid (1.2 mol/equiv) and Pd(OAc)<sub>2</sub> (2 mol %) in the same volume of DMF. The resultant mixture was heated at 80 °C for 5 h under stirring. The final solution was allowed to cool to room temperature and extracted with dichloromethane or ethyl acetate. The organic layer was washed with water and aqueous 0.1 M KOH, dried over anhydrous sodium sulfate and evaporated, yielding the product as impure 1-arylferrocene.

1.2.1. *l*-Phenylferrocene, **1a** ( $R = H$ ). The orange oil obtained (0.36 g,  $\eta = 46\%$ ) was washed with MeOH and sublimed under reduced pressure to yield orange crystals of the titled compound;  $^1\text{H NMR}$  (300.13 MHz,  $\text{CDCl}_3$ ): 7.51-7.45 (2H, m, H4), 7.29 (2H, t, H5,  $J = 7.2$  Hz), 7.19 (1H, tt, H6,  $J_1 = 7.2$  Hz,  $J_2 = 1.6$  Hz), 4.65 (2H, t, H2,  $J = 1.8$  Hz), 4.31 (2H, t, H3,  $J = 1.8$  Hz), 4.04 (5H, s, H1); see spectrum below for atom numbering. ESI-MS: calculated for ( $\text{M}^+$ ) 262.0, found 262.0.

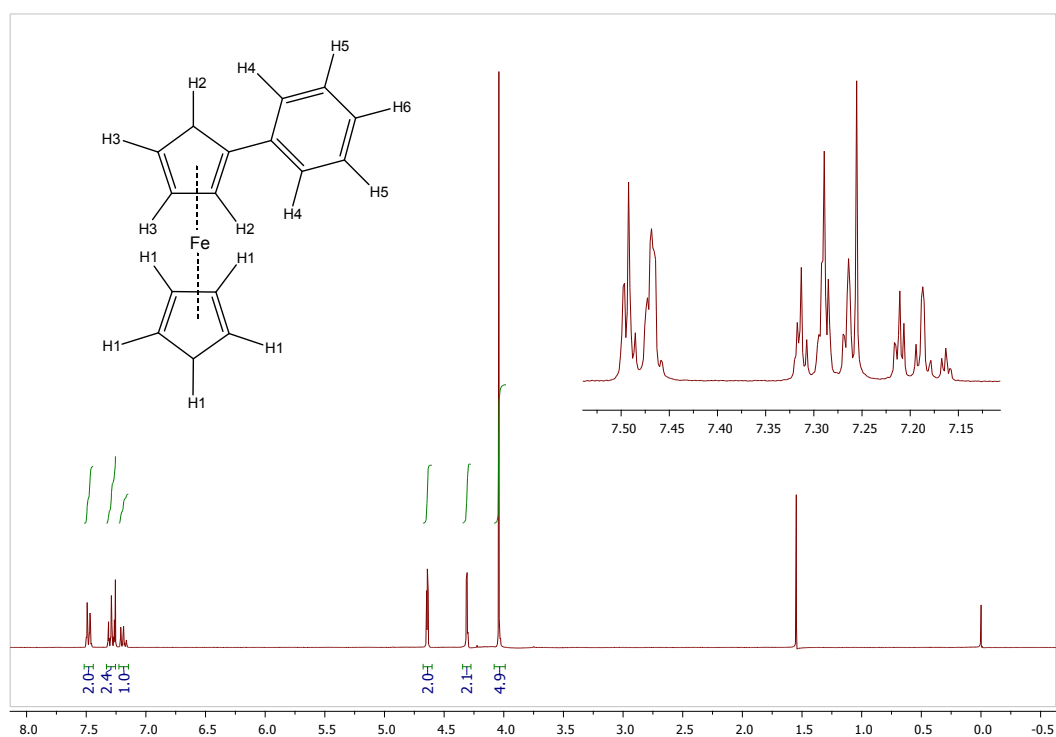

1.2.2. *1-([1,1'-Biphenyl]-4-yl)ferrocene 1b* ( $R = Ph$ ). The orange flakes obtained (0.27 g,  $\eta = 53\%$ ) were washed with MeOH and diethyl ether and sublimed under reduced pressure to yield orange crystals of the titled compound;  $^1\text{H}$  NMR (300.13 MHz,  $\text{CDCl}_3$ ): 7.62 (2H, d, H6,  $J = 7.2$  Hz), 7.54 (4H, m, H4 + H5), 7.44 (2H, t, H7,  $J = 7.3$  Hz), 7.34 (1H, t, H8,  $J = 7.3$  Hz), 4.68 (2H, t, H2,  $J = 1.8$  Hz), 4.33 (2H, t, H3,  $J = 1.8$  Hz), 4.07 (5H, s, H1);  $^{13}\text{C}$  NMR (75.47 MHz,  $\text{CDCl}_3$ ): 140.9, 138.6, 138.4, 128.8, 127.1, 127.0, 126.8, 126.5, 85.0, 69.6, 69.0, 66.5; see spectrum below for atom numbering. ESI-MS: calculated for ( $\text{M}^+$ ) 338.1, found 338.1.

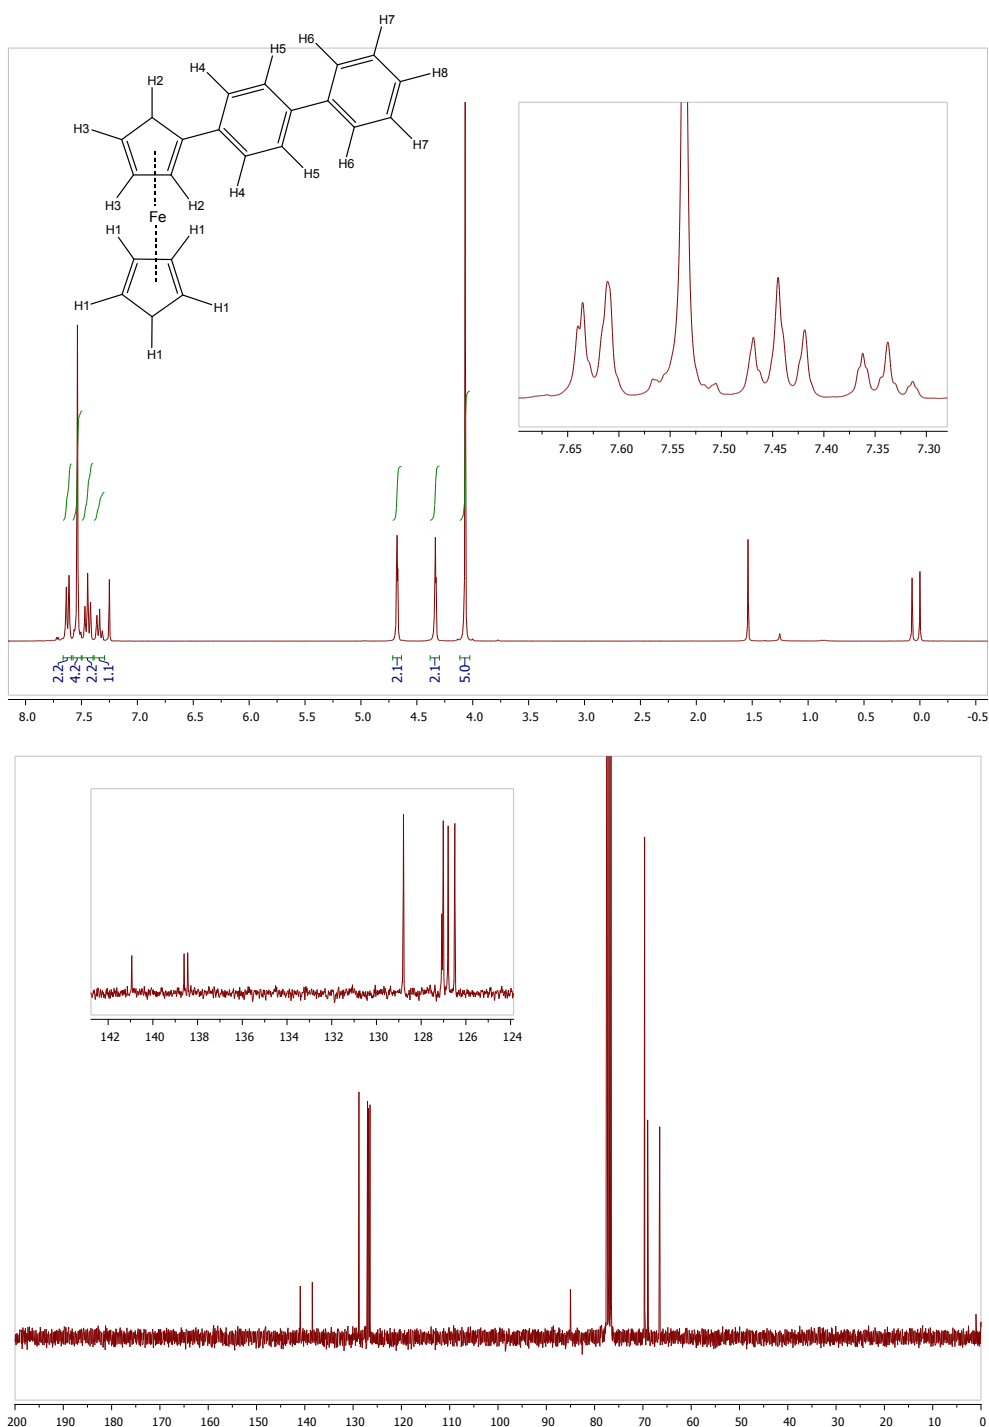

1.2.3. *1-(4-Methoxyphenyl)ferrocene 1c* ( $R = OCH_3$ ). The orange oil obtained (0.27 g,  $\eta = 46\%$ ) was washed with MeOH and sublimed under reduced pressure to yield orange crystals of the titled compound;  $^1\text{H}$  NMR (300.13 MHz,  $\text{CDCl}_3$ ): 7.40 (2H, dt, H4,  $J_1 = 8.7$  Hz,  $J_2 = 2.5$  Hz), 6.84 (2H, dt, H5,  $J_1 = 8.7$  Hz,  $J_2 = 2.5$  Hz), 4.57 (2H, t, H2,  $J = 1.8$  Hz), 4.27 (2H, t, H3,  $J = 1.8$  Hz), 4.04 (5H, s, H1), 3.82 (3H, s,  $\text{OCH}_3$ );  $^{13}\text{C}$  NMR (75.47 MHz,  $\text{CDCl}_3$ ): 158.0, 131.3, 127.2, 113.8, 85.9, 69.5, 68.5, 66.1, 55.3; see spectrum below for atom numbering. ESI-MS: calculated for ( $\text{M}^+$ ) 292.1, found 292.1.

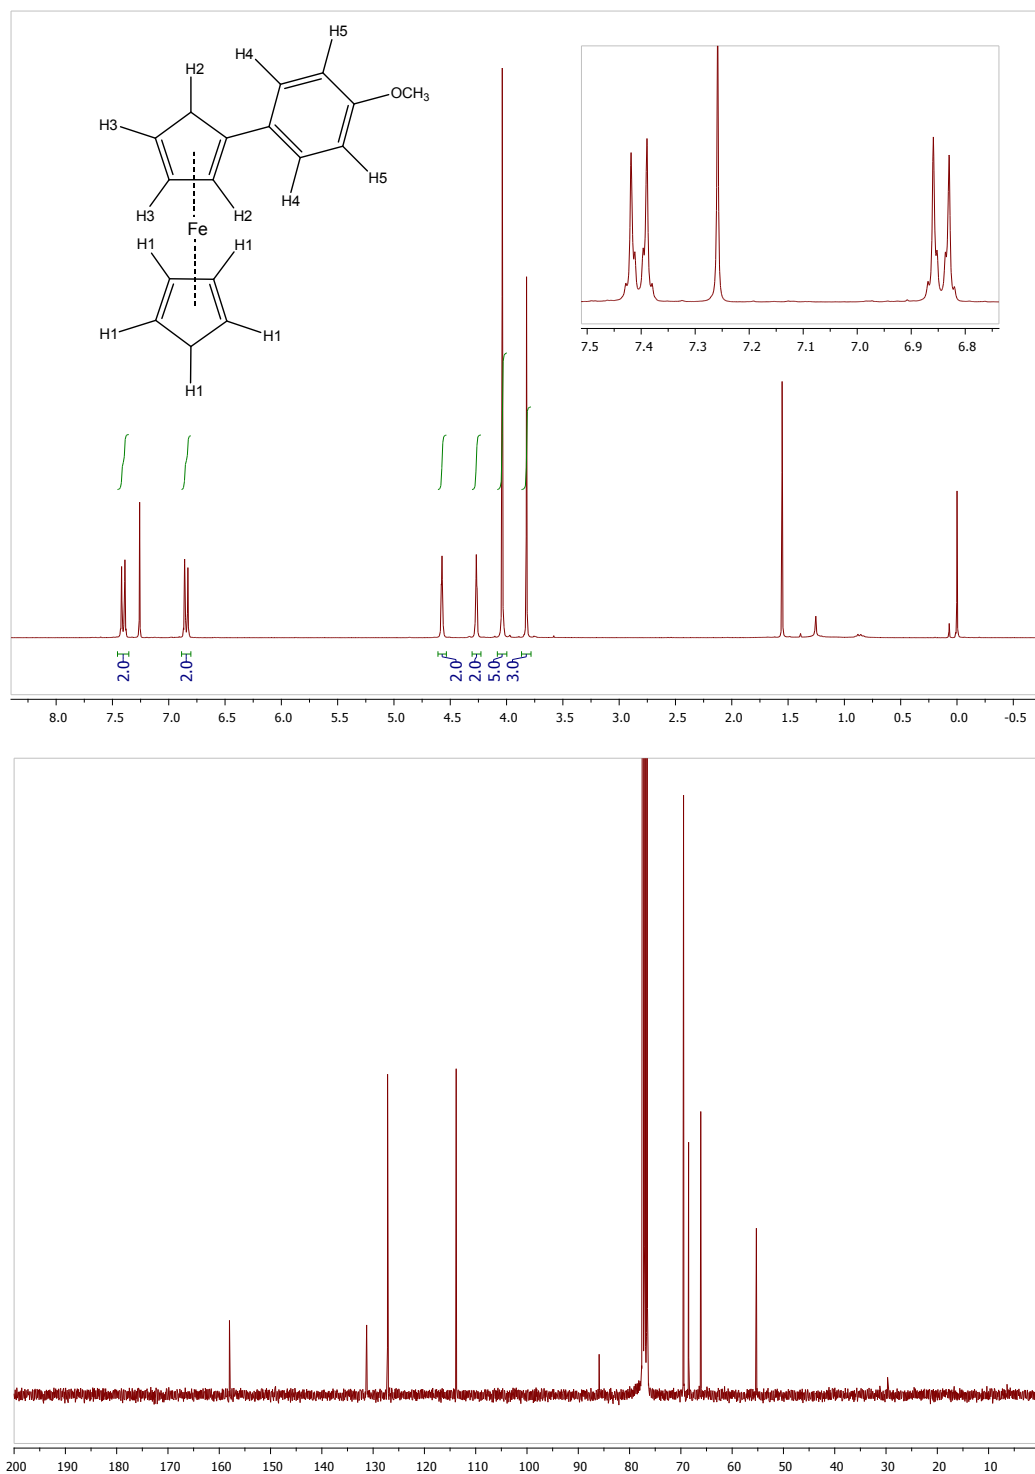

1.2.4. *4-(Ferrocen-1-yl)benzaldehyde 1d* ( $R = CHO$ ). The orange oil obtained (0.19 g,  $\eta = 33\%$ ) was washed with MeOH and sublimed under reduced pressure to yield dark orange crystals of the titled compound;  $^1\text{H}$  NMR (300.13 MHz,  $\text{CDCl}_3$ ): 9.97 (1H, s, CHO), 7.79 (2H, d, H5,  $J = 8.4$ ), 7.59 (2H, d, H4,  $J = 8.4$  Hz), 4.74 (2H, t, H2,  $J = 1.8$  Hz), 4.44 (2H, t, H3,  $J = 1.8$  Hz), 4.05 (5H, s, H1);  $^{13}\text{C}$  NMR (75.47 MHz,  $\text{CDCl}_3$ ): 191.8, 147.4, 134.0, 130.0, 126.1, 82.8, 70.2, 69.9, 67.1; see spectrum below for atom numbering. ESI-MS: calculated for ( $\text{M}^+$ ) 290.0, found 290.0.

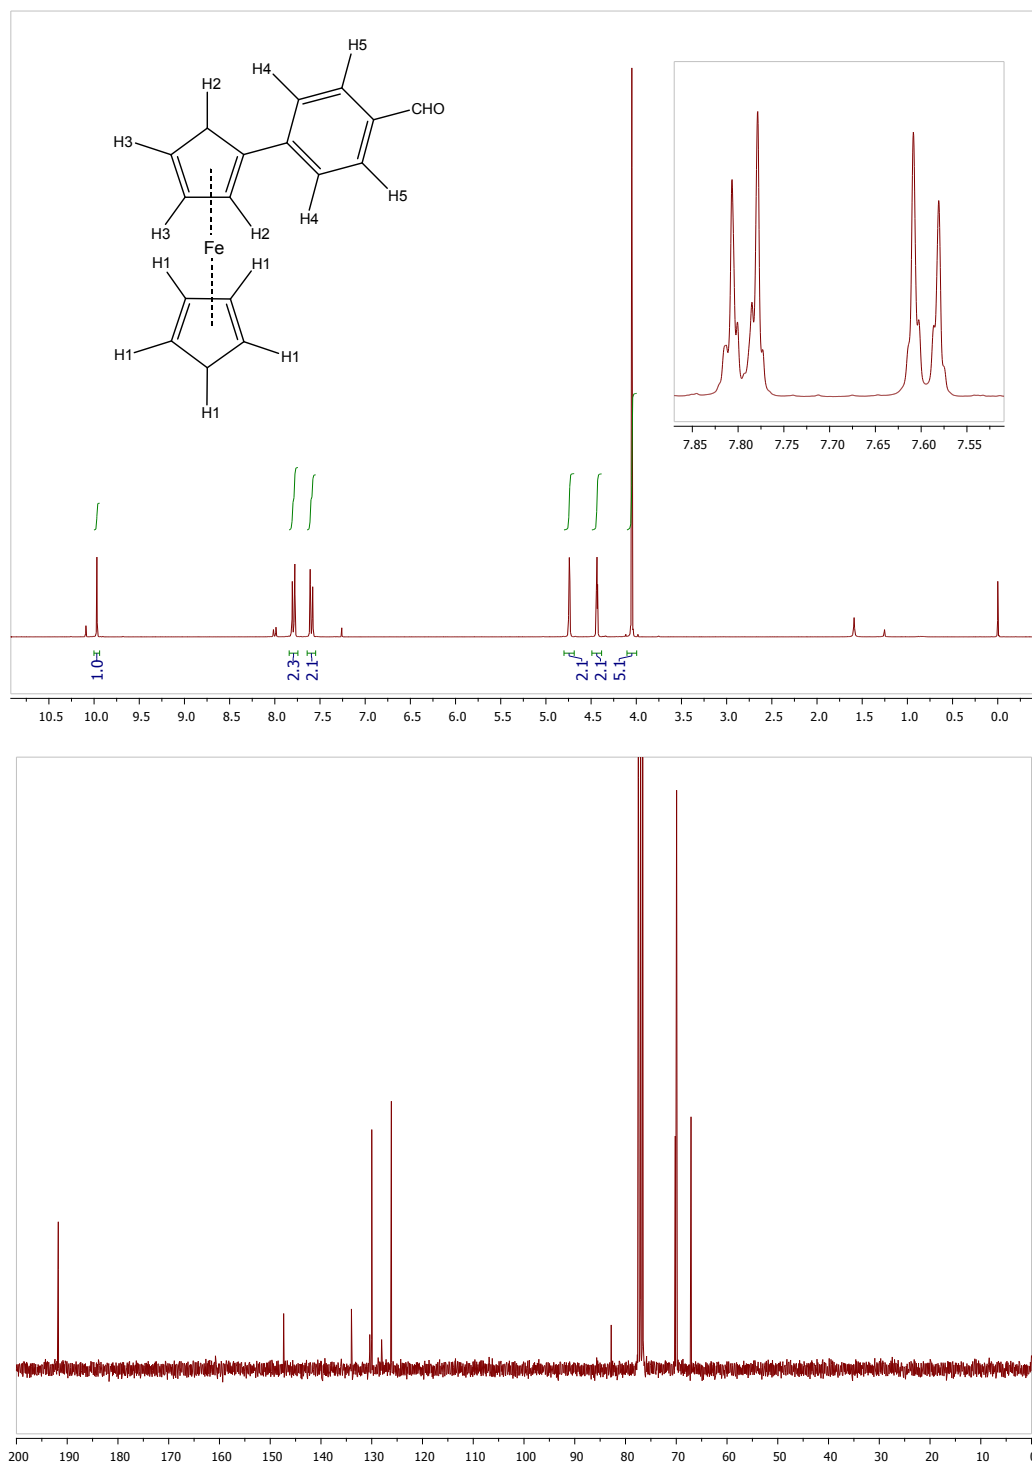

**1.3. General synthesis of 1,1'-diarylferrocenes (2a-d).** A solution of  $K_2CO_3$  (6 mol/equiv) in 15 ml of water per 1 mmol of the limiting reactant was added to a solution of 1,1'-dibromoferrocene (1 mol/equiv), arylboronic acid (4 mol/equiv) and  $Pd(OAc)_2$  (2 mol %) in the same volume of DMF. The resultant mixture was heated at 80 °C for 5 h under stirring. The final solution was allowed to cool to room temperature and extracted with dichloromethane. The organic layer was washed with water and aqueous 0.1 M KOH, dried over anhydrous sodium sulfate and evaporated, yielding the product as impure 1,1'-diarylferrocene.

**1.3.1. 1,1'-Diphenylferrocene 2a ( $R = H$ ).** The orange powder obtained (0.20 g,  $\eta = 59\%$ ) was washed with MeOH and sublimed under reduced pressure to yield orange crystals of the titled compound;  $^1H$  NMR (300.13 MHz,  $CDCl_3$ ): 7.34–7.29 (4H, m, H3), 7.25–7.13 (6H, m, H4 + H5), 4.46 (4H, t, H1,  $J = 1.8$  Hz), 4.20 (4H, t, H2,  $J = 1.8$  Hz); see spectrum below for atom numbering. ESI-MS: calculated for ( $M^+$ ) 338.1, found 338.0.

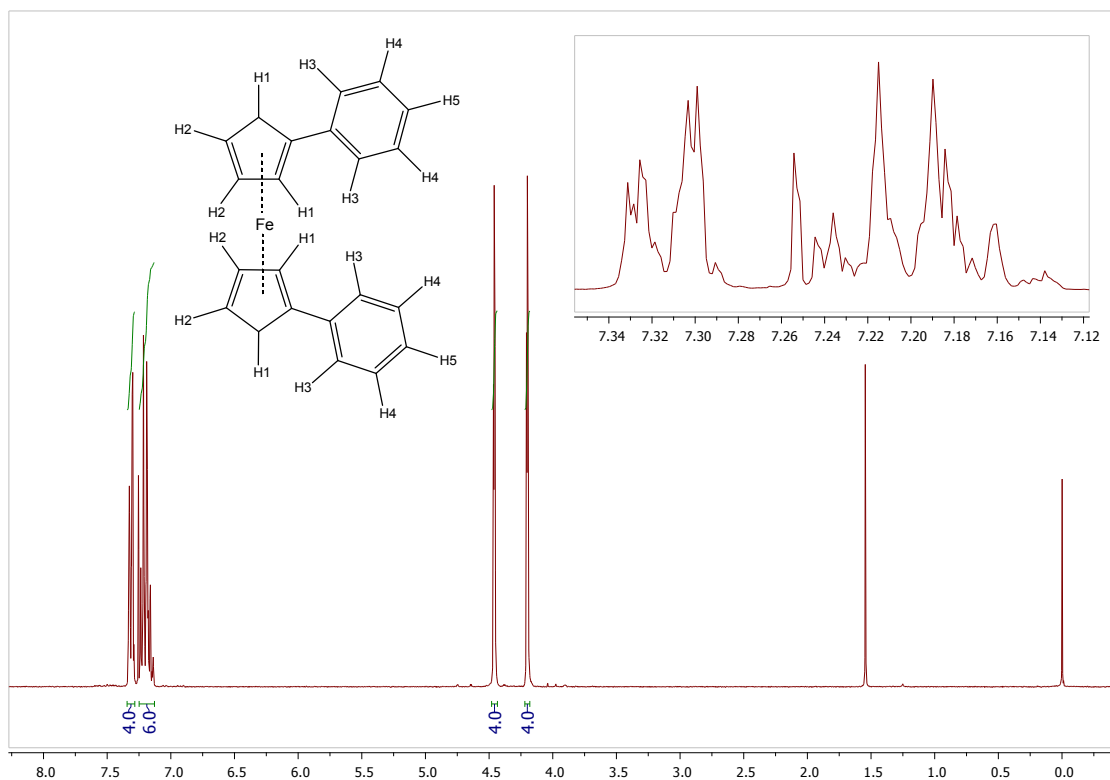

1.3.2. *1,1'*-Bis(*[1,1'*-diphenyl]-4-yl)ferrocene **2b** (*R* = *Ph*). The orange powder obtained (0.13 g,  $\eta$  = 27%) was washed with MeOH and sublimed under reduced pressure to yield orange crystals of the titled compound;  $^1\text{H}$  NMR (300.13 MHz,  $\text{CDCl}_3$ ): 7.53 (4H, d, H5,  $J$  = 6.9 Hz), 7.42–7.30 (14H, m, H3 + H4 + H6 + H7), 4.56 (4H, t, H1,  $J$  = 1.8 Hz), 4.28 (4H, t, H2,  $J$  = 1.8 Hz);  $^{13}\text{C}$  NMR (75.47 MHz,  $\text{CDCl}_3$ ): 140.9, 138.5, 136.9, 128.7, 127.0, 126.8, 126.7, 126.2, 85.8, 70.4, 67.7; see spectrum below for atom numbering. ESI-MS: calculated for ( $\text{M}^+$ ) 490.1, found 490.1.

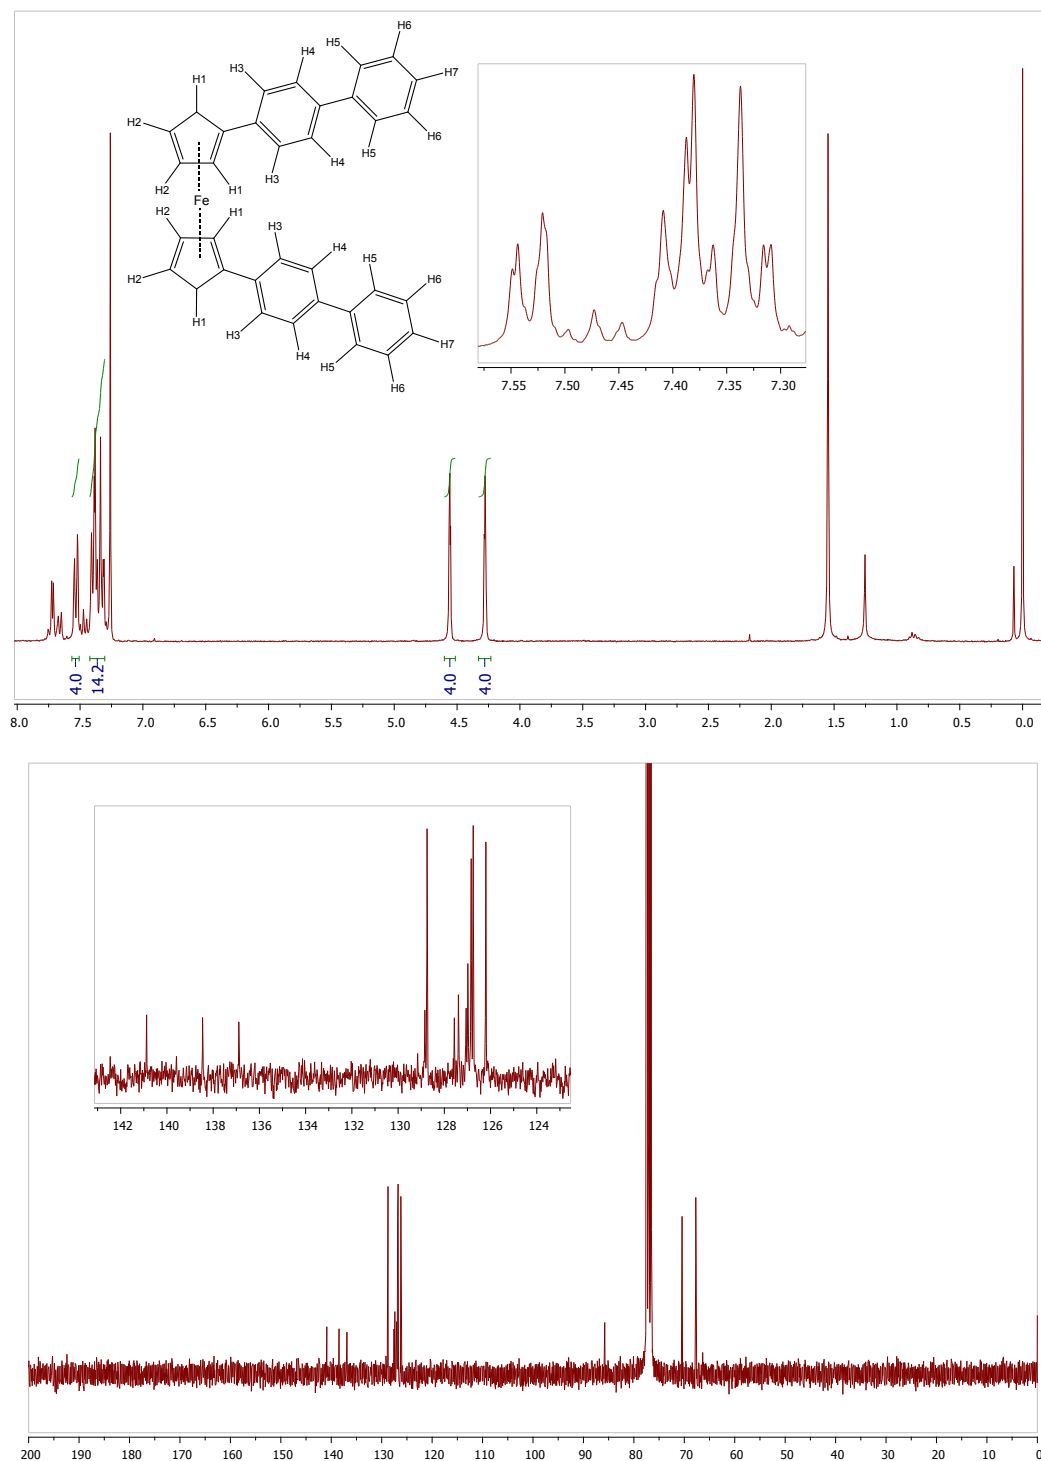



1.3.3. *1,1'*-Bis(4-methoxyphenyl)ferrocene **2c** ( $R = OCH_3$ ). The orange powder obtained (0.17 g,  $\eta = 49\%$ ) was washed with MeOH and sublimed under reduced pressure to yield orange crystals of the titled compound;  $^1\text{H}$  NMR (300.13 MHz,  $\text{CDCl}_3$ ): 7.20 (4H, dt, H3,  $J_1 = 8.7$  Hz,  $J_2 = 2.5$  Hz), 6.74 (4H, dt, H4,  $J_1 = 8.7$  Hz,  $J_2 = 2.5$  Hz), 4.40 (4H, t, H1,  $J = 1.8$  Hz), 4.17 (4H, t, H2,  $J = 1.8$  Hz), 3.82 (6H, s,  $\text{OCH}_3$ );  $^{13}\text{C}$  NMR (75.47 MHz,  $\text{CDCl}_3$ ): 158.0, 130.1, 127.0, 113.7, 86.6, 69.9, 67.3, 55.2; see spectrum below for atom numbering. ESI-MS: calculated for ( $\text{M}^+$ ) 398.1, found 398.1.

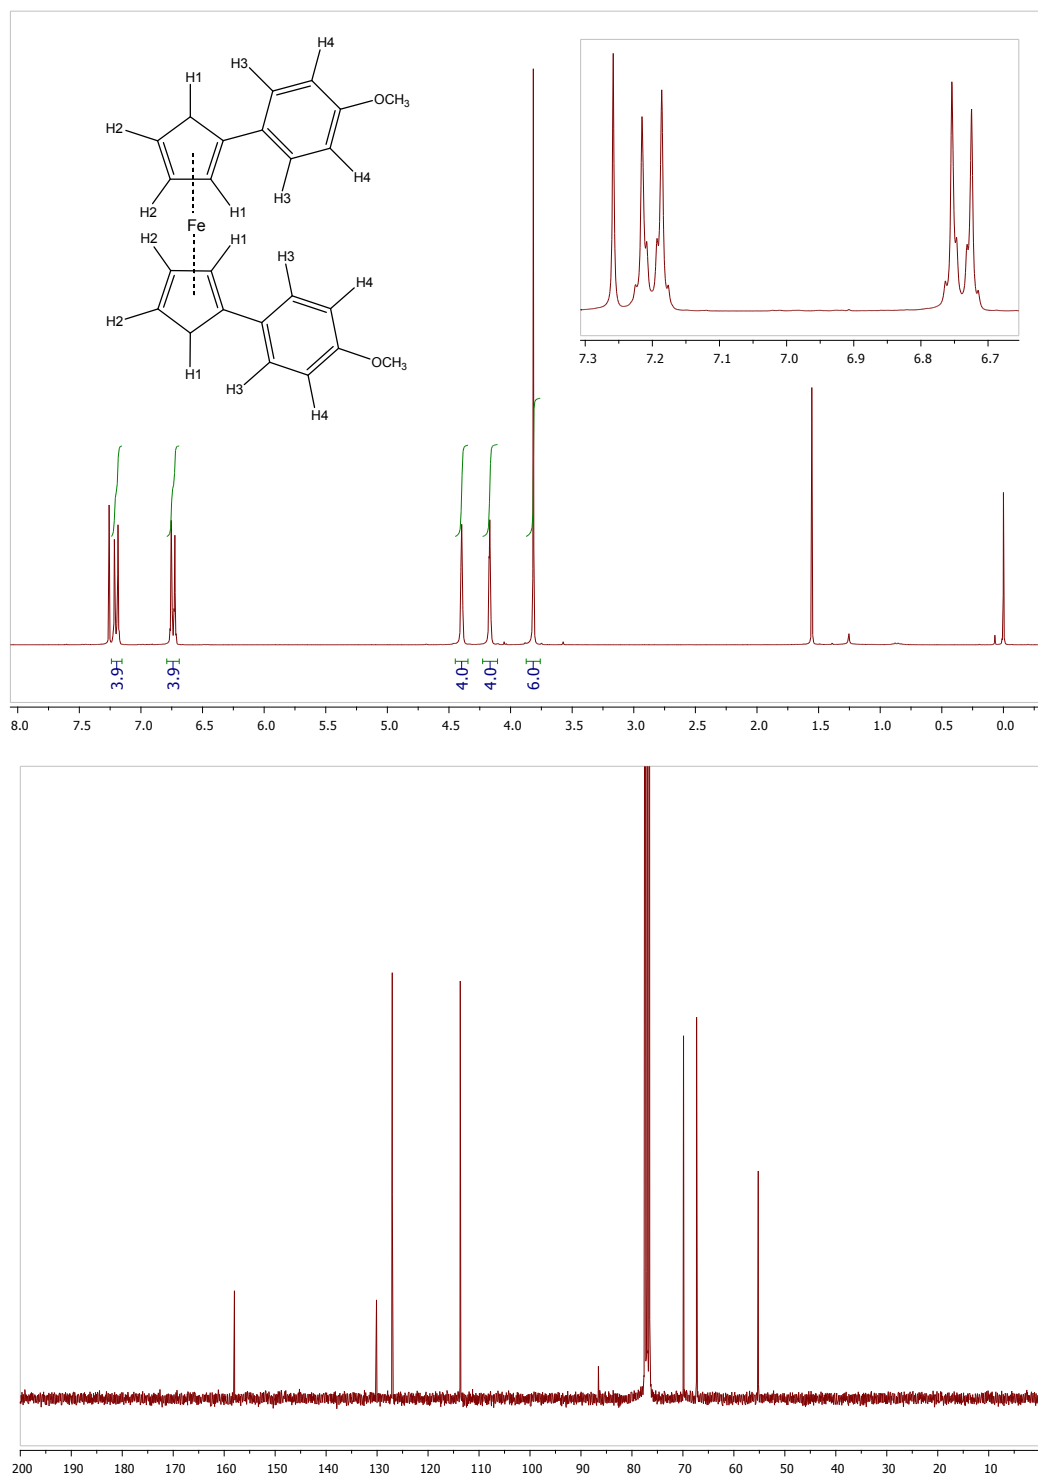

1.3.4. 4,4'-(Ferrocen-1,1'-diyl)dibenzaldehyde **2d** ( $R = CHO$ ). The orange powder obtained (0.16 g,  $\eta = 41\%$ ) was washed with MeOH and sublimed under reduced pressure to yield dark orange crystals of the titled compound;  $^1\text{H}$  NMR (300.13 MHz,  $\text{CDCl}_3$ ): 9.92 (2H, s, CHO), 7.61 (4H, d, H4,  $J = 8.4$  Hz), 7.29 (4H, d, H3,  $J = 8.4$  Hz), 4.60 (4H, t, H1,  $J = 1.8$  Hz), 4.37 (4H, t, H2,  $J = 1.8$  Hz);  $^{13}\text{C}$  NMR (75.47 MHz,  $\text{CDCl}_3$ ): 191.6, 144.8, 134.0, 129.9, 125.9, 84.2, 71.6, 68.5; see spectrum below for atom numbering. ESI-MS: calculated for ( $\text{M}^+$ ) 394.1, found 394.1.

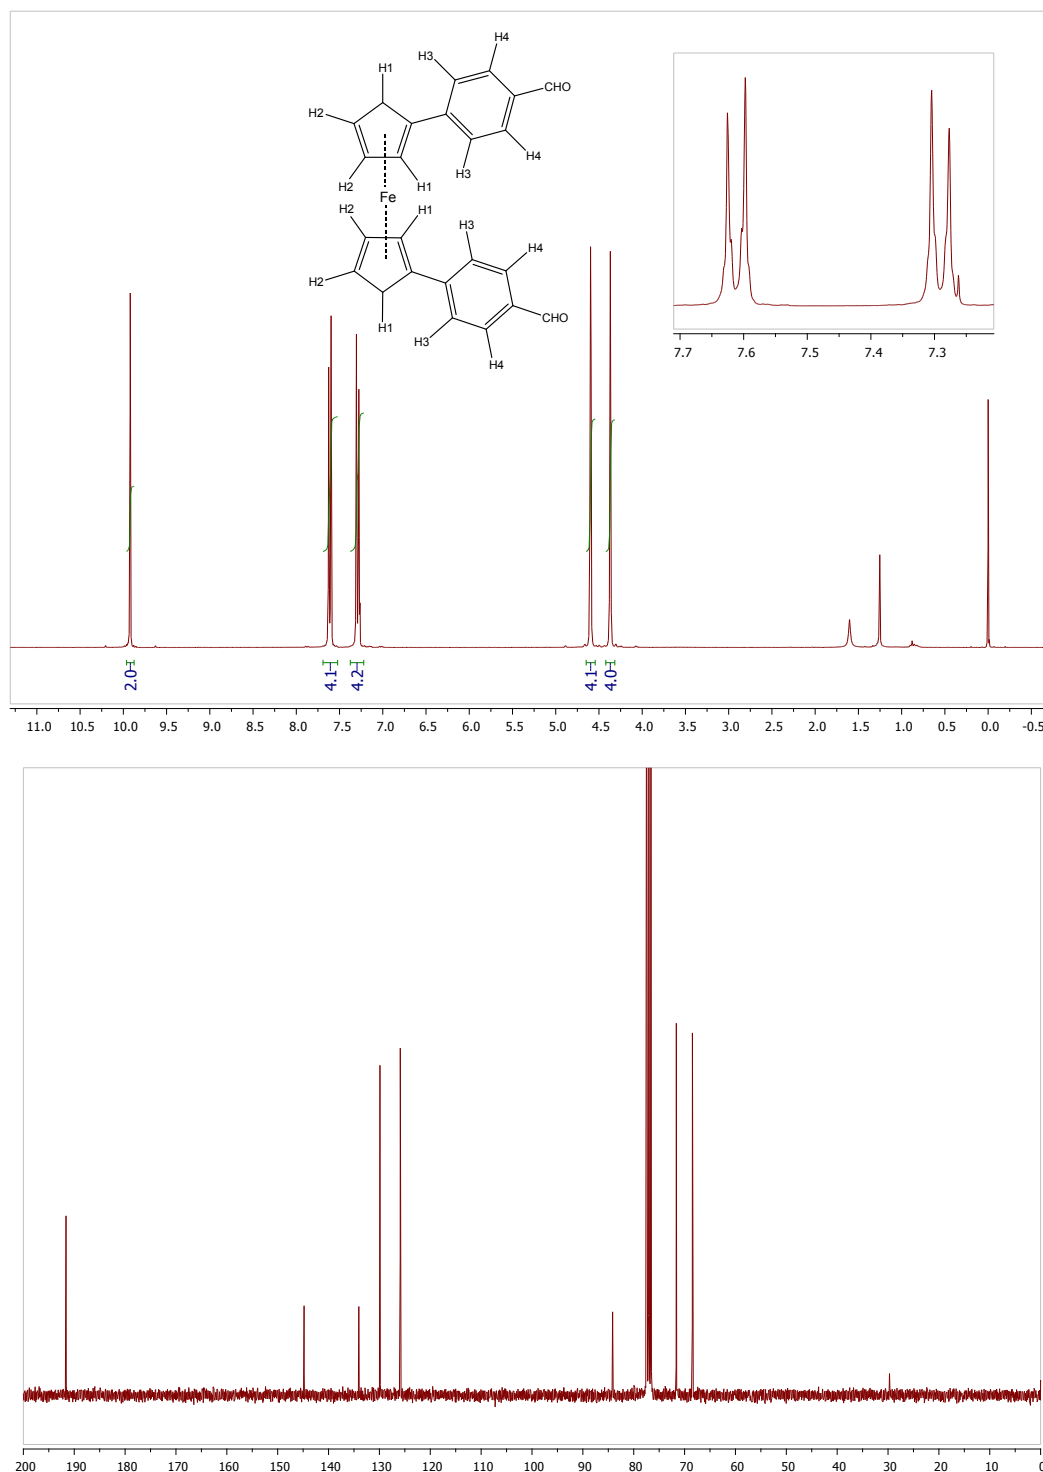

## Section S2. Mass spectrometry analysis

### 2.1. Electrospray Ionization mass spectra of 1-arylferrocenes (1a-d) and 1,1'-diarylferrocenes (2a-d)

As an illustration, figure S1 represents the ESI-MS spectrum of 4,4'-(ferrocen-1,1'-diyl)dibenzaldehyde, **2d** (R = CHO), in the positive mode (+).

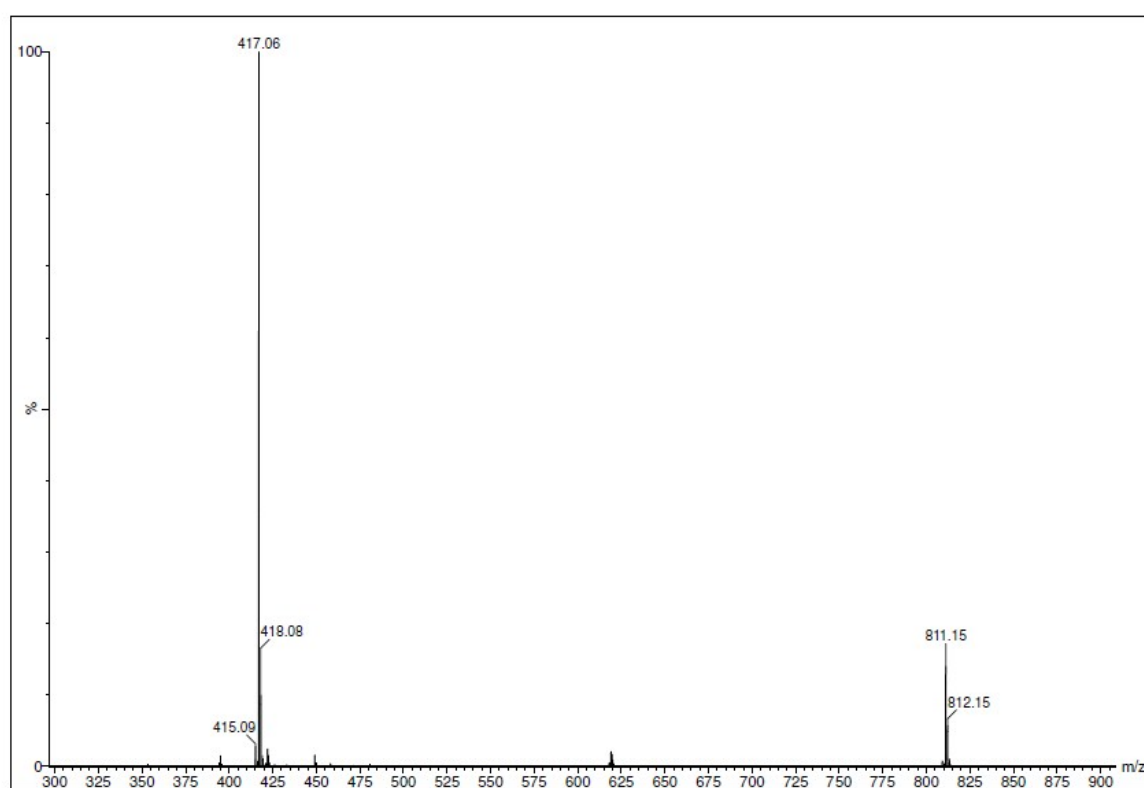

**Figure S1.** ESI-MS(+) of 4,4'-(ferrocen-1,1'-diyl)dibenzaldehyde **2d**.

## 2.2. Electrospray ionization MS-MS spectra

Figure S2 shows, as an illustration, the ESI-MS-MS spectra of the  $[2M+NH_4]^+$  ion for 4,4'-(ferrocen-1,1'-diyl)dibenzaldehyde, **2d** (R = CHO).

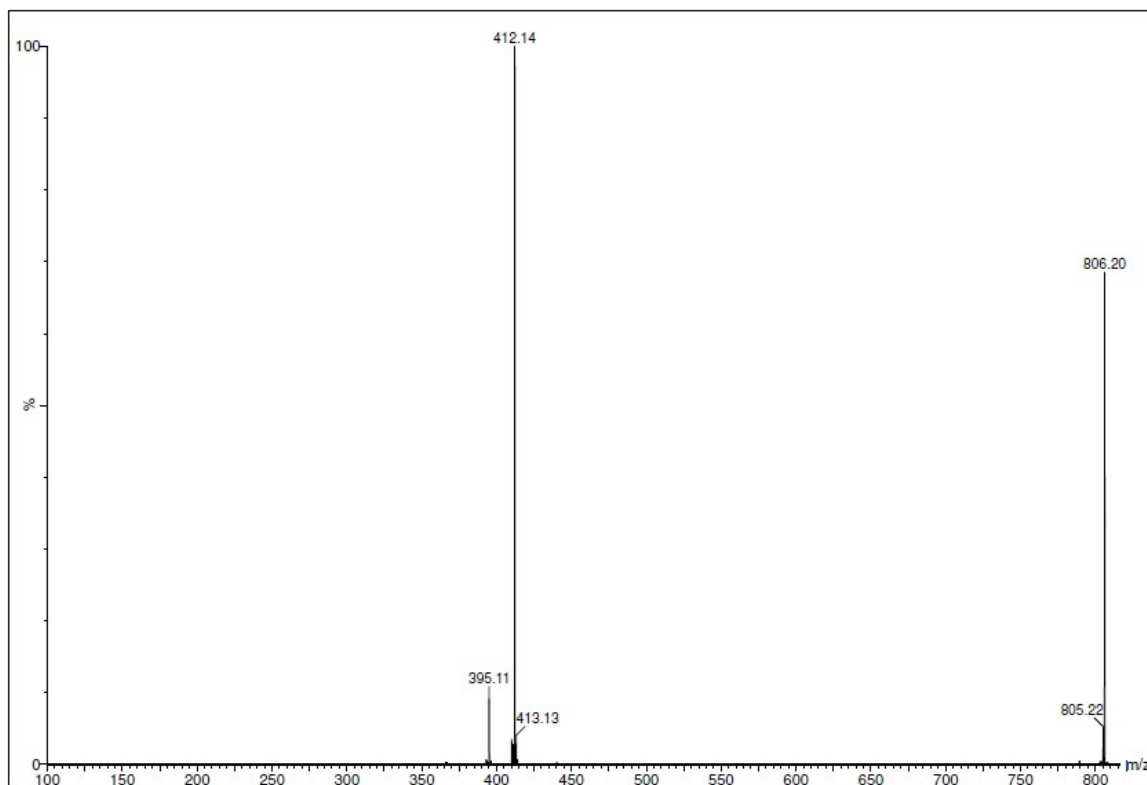

**Figure S2.** ESI-MS-MS spectrum of  $[2M+NH_4]^+$  [ $M = \mathbf{2d}$  (R = CHO)] at a collision energy of 4,0 eV.

The  $E_{cm,1/2}$  values obtained for  $[2M+NH_4]^+$ ,  $[2M+Na]^+$  and  $[2M+Li]^+$ ,  $M = \mathbf{2d}$  (R = CHO), by the procedure described in the experimental part, are shown below.

|               | Ion m/z | $E_{Lab,1/2}/eV$ | $E_{cm,1/2}/eV$ |
|---------------|---------|------------------|-----------------|
| $[2M+NH_4]^+$ | 806     | 4.5              | 0,212           |
| $[2M+Na]^+$   | 811     | 10.5             | 0.495           |
| $[2M+Li]^+$   | 795     | 13.7             | 0.654           |

## Section S3. Quantum chemistry calculations

### 3.1. Conformational analysis of 1,1'-diarylferrocenes (**2a-d**) in the gas phase.

Tables S1 and S2 show the results of the conformational analysis carried out by computational chemistry for the ferrocenes studied.

**Table S1.** Electronic energies,  $E_{\text{el}}$ , and enthalpies at  $T = 298.15$  K,  $H_{298\text{K}}$ , ( $H_{298\text{K}} = E_{\text{el}} + \text{ZPE} + T_{\text{c}}H$ , where ZPE and  $T_{\text{c}}H$  are the unscaled zero-point energy and thermal correction to enthalpy, respectively) obtained at the M06-2X/6-31+G(d,p)/SDD(Fe) level of theory and used for the evaluation of folded/unfolded energetics.

| Molecular system                                             | $E_{\text{el}}$ / hartree | $H_{298\text{K}}$ / hartree |
|--------------------------------------------------------------|---------------------------|-----------------------------|
| Ferrocene                                                    | -510.790210               | -510.440471                 |
| 1-Phenylferrocene <b>1a</b>                                  | -741.762210               | -741.243611                 |
| 1-([1,1'-Biphenyl]-4-yl)ferrocene <b>1b</b>                  | -972.732363               | -972.045020                 |
| 1-(4-Methoxyphenyl)ferrocene <b>1c</b>                       | -856.244041               | -855.656075                 |
| 4-(Ferrocen-1-yl)benzaldehyde <b>1d</b>                      | -855.049214               | -854.508910                 |
| 1,1'-Diphenylferrocene (folded) <b>2a</b>                    | -972.738341               | -972.050715                 |
| 1,1'-Diphenylferrocene (unfolded) <b>2a</b>                  | -972.734271               | -972.046880                 |
| 1,1'-Bis([1,1'-diphenyl]-4-yl)ferrocene (folded) <b>2b</b>   | -1434.686464              | -1433.665030                |
| 1,1'-Bis([1,1'-diphenyl]-4-yl)ferrocene (unfolded) <b>2b</b> | -1434.673997              | -1433.652961                |
| 1,1'-Bis(4-methoxyphenyl)ferrocene (folded) <b>2c</b>        | -1201.705875              | -1200.880340                |
| 1,1'-Bis(4-methoxyphenyl)ferrocene (unfolded) <b>2c</b>      | -1201.697581              | -1200.872451                |
| 4,4'-(Ferrocen-1,1'-diyl)dibenzaldehyde (folded) <b>2d</b>   | -1199.315624              | -1198.585378                |
| 4,4'-(Ferrocen-1,1'-diyl)dibenzaldehyde (unfolded) <b>2d</b> | -1199.307801              | -1198.578614                |

**Table S2.** Electronic energies,  $E_{\text{el}}$ , obtained at the M06-2X/6-31+G(d,p)/SDD(Fe) level of theory, for the *syn/anti* conformers of **2c** (R = OCH<sub>3</sub>) and **2d** (R = CHO).

| Molecular system                                             | $E_{\text{el}}$ / hartree ( $\Delta_{\text{r}}E_{\text{el}}$ / kJ·mol <sup>-1</sup> ) <sup>[a]</sup> |
|--------------------------------------------------------------|------------------------------------------------------------------------------------------------------|
|                                                              | M06-2X                                                                                               |
| <b>1,1'-Bis(4-methoxyphenyl)ferrocene (<i>anti</i>)</b>      | -1201.705875                                                                                         |
| 1,1'-Bis(4-methoxyphenyl)ferrocene ( <i>syn</i> )            | -1201.704198 ( <b>4.4</b> )                                                                          |
| <b>4,4'-(Ferrocen-1,1'-diyl)dibenzaldehyde (<i>anti</i>)</b> | -1199.315624                                                                                         |
| 4,4'-(Ferrocen-1,1'-diyl)dibenzaldehyde ( <i>syn</i> )       | -1199.313539 ( <b>5.5</b> )                                                                          |

<sup>[a]</sup> The  $\Delta_{\text{r}}E_{\text{el}}$  for the *anti* → *syn* isomerization reaction is shown in parenthesis. The most stable conformer is shown in bold.

### 3.2. PES scans and interaction energy calculations.

**Table S3.** Results for the scan of the potential energy surface (PES) relative to the  $d(\text{Fe}\cdots\text{Na}^+)$  degree of freedom in 1,1'-diphenylferrocene **2a**, obtained at the M06-2X/6-31+G(d,p)/SDD(Fe) level of theory.

| $d(\text{Fe}\cdots\text{Na}^+) / \text{\AA}$ | $E_{\text{el}} / \text{Hartree}$ | $\Delta_{\text{rel}}E_{\text{m}} / \text{kJ}\cdot\text{mol}^{-1}$ | $\Delta_{\text{int}}E_{\text{m}} / \text{kJ}\cdot\text{mol}^{-1}$ |
|----------------------------------------------|----------------------------------|-------------------------------------------------------------------|-------------------------------------------------------------------|
| 2.8                                          | -1134.837755                     | 58                                                                | -144                                                              |
| 3.2                                          | -1134.844206                     | 41                                                                | -161                                                              |
| 3.6                                          | -1134.849694                     | 26                                                                | -176                                                              |
| 4.0                                          | -1134.853591                     | 16                                                                | -186                                                              |
| <b>4.42</b>                                  | <b>-1134.859717</b>              | <b>0</b>                                                          | <b>-202</b>                                                       |
| 4.8                                          | -1134.856105                     | 9                                                                 | -192                                                              |
| 5.2                                          | -1134.853981                     | 15                                                                | -187                                                              |
| 5.6                                          | -1134.848286                     | 30                                                                | -172                                                              |
| 6.0                                          | -1134.842916                     | 44                                                                | -158                                                              |
| 6.4                                          | -1134.837926                     | 57                                                                | -145                                                              |
| 6.8                                          | -1134.832557                     | 71                                                                | -131                                                              |

**Table S4.** Results for the scan of the potential energy surface (PES) relative to the  $d(\text{Fe}\cdots\text{Na}^+)$  degree of freedom in 1,1'-bis([1,1'-diphenyl]-4-yl)ferrocene **2b**, obtained at the M06-2X/6-31+G(d,p)/SDD(Fe) level of theory.

| $d(\text{Fe}\cdots\text{Na}^+) / \text{\AA}$ | $E_{\text{el}} / \text{Hartree}$ | $\Delta_{\text{rel}}E_{\text{m}} / \text{kJ}\cdot\text{mol}^{-1}$ | $\Delta_{\text{int}}E_{\text{m}} / \text{kJ}\cdot\text{mol}^{-1}$ |
|----------------------------------------------|----------------------------------|-------------------------------------------------------------------|-------------------------------------------------------------------|
| 3.5                                          | -1596.794692                     | 38                                                                | -167                                                              |
| <b>4.36</b>                                  | <b>-1596.805225</b>              | <b>10</b>                                                         | <b>-195</b>                                                       |
| 5.5                                          | -1596.797344                     | 31                                                                | -174                                                              |
| 6.5                                          | -1596.794281                     | 39                                                                | -166                                                              |
| 7.5                                          | -1596.793856                     | 40                                                                | -165                                                              |
| 8.5                                          | -1596.804585                     | 12                                                                | -193                                                              |
| <b>8.70</b>                                  | <b>-1596.809006</b>              | <b>0</b>                                                          | <b>-205</b>                                                       |
| 9.5                                          | -1596.790021                     | 50                                                                | -155                                                              |
| 10.5                                         | -1596.782395                     | 70                                                                | -135                                                              |

**Table S5.** Results for the scan of the potential energy surface (PES) relative to the  $d(\text{Fe}\cdots\text{Na}^+)$  degree of freedom in 1,1'-bis(4-methoxyphenyl)ferrocene **2c**, obtained at the M06-2X/6-31+G(d,p)/SDD(Fe) level of theory.

| $d(\text{Fe}\cdots\text{Na}^+) / \text{\AA}$ | $E_{\text{el}} / \text{Hartree}$ | $\Delta_{\text{rel}}E_{\text{m}} / \text{kJ}\cdot\text{mol}^{-1}$ | $\Delta_{\text{int}}E_{\text{m}} / \text{kJ}\cdot\text{mol}^{-1}$ |
|----------------------------------------------|----------------------------------|-------------------------------------------------------------------|-------------------------------------------------------------------|
| 3.5                                          | -1363.817267                     | 25                                                                | -176                                                              |
| 4.0                                          | -1363.821181                     | 14                                                                | -186                                                              |
| <b>4.34</b>                                  | <b>-1363.826649</b>              | <b>0</b>                                                          | <b>-200</b>                                                       |
| 4.5                                          | -1363.824898                     | 5                                                                 | -196                                                              |
| 5.0                                          | -1363.820908                     | 15                                                                | -185                                                              |
| 5.5                                          | -1363.815277                     | 30                                                                | -170                                                              |
| 6.0                                          | -1363.816340                     | 27                                                                | -173                                                              |
| 6.5                                          | -1363.818285                     | 22                                                                | -178                                                              |
| 7.0                                          | -1363.822309                     | 11                                                                | -189                                                              |
| <b>7.31</b>                                  | <b>-1363.826478</b>              | <b>0</b>                                                          | <b>-200</b>                                                       |
| 7.5                                          | -1363.810885                     | 41                                                                | -159                                                              |
| 8.0                                          | -1363.806306                     | 53                                                                | -147                                                              |
| 8.5                                          | -1363.809532                     | 45                                                                | -155                                                              |
| 9.0                                          | -1363.792862                     | 89                                                                | -112                                                              |
| 9.5                                          | -1363.782354                     | 116                                                               | -84                                                               |
| 10.0                                         | -1363.771378                     | 145                                                               | -55                                                               |
| 10.5                                         | -1363.758078                     | 180                                                               | -20                                                               |

**Table S6.** Results for the scan of the potential energy surface (PES) relative to the  $d(\text{Fe}\cdots\text{Na}^+)$  degree of freedom in 4,4'-(ferrocen-1,1'-diyl)dibenzaldehyde **2d**, obtained at the M06-2X/6-31+G(d,p)/SDD(Fe) level of theory.

| $d(\text{Fe}\cdots\text{Na}^+) / \text{\AA}$ | $E_{\text{el}} / \text{Hartree}$ | $\Delta_{\text{rel}}E_{\text{m}} / \text{kJ}\cdot\text{mol}^{-1}$ | $\Delta_{\text{int}}E_{\text{m}} / \text{kJ}\cdot\text{mol}^{-1}$ |
|----------------------------------------------|----------------------------------|-------------------------------------------------------------------|-------------------------------------------------------------------|
| 3.5                                          | -1361.406673                     | 123                                                               | -122                                                              |
| 4.0                                          | -1361.412801                     | 107                                                               | -138                                                              |
| 4.5                                          | -1361.412946                     | 107                                                               | -139                                                              |
| 5.0                                          | -1361.412584                     | 108                                                               | -138                                                              |
| 5.5                                          | -1361.415847                     | 99                                                                | -146                                                              |
| 6.0                                          | -1361.416509                     | 97                                                                | -148                                                              |
| 6.5                                          | -1361.432004                     | 57                                                                | -189                                                              |
| 7.0                                          | -1361.428094                     | 67                                                                | -178                                                              |
| 7.5                                          | -1361.438112                     | 41                                                                | -205                                                              |
| 8.0                                          | -1361.441327                     | 32                                                                | -213                                                              |
| 8.5                                          | -1361.449263                     | 11                                                                | -234                                                              |
| <b>8.9</b>                                   | <b>-1361.453577</b>              | <b>0</b>                                                          | <b>-245</b>                                                       |
| 9.5                                          | -1361.448903                     | 12                                                                | -233                                                              |
| 10.0                                         | -1361.435144                     | 48                                                                | -197                                                              |
| 10.5                                         | -1361.421736                     | 84                                                                | -162                                                              |



**Table S7.** Electronic energies,  $E_{\text{el}}$ , and unscaled ZPE (zero-point energy) and  $T_c H$  (thermal correction to enthalpy to 298.15 K), obtained at the M06-2X/6-31+G(d,p)/SDD(Fe) level of theory for the systems studied, and MP2/6-31+G(d,p)/SDD(Fe) electronic energies,  $E_{\text{el}}$  (MP2), obtained from a single point energy calculation on the M06-2X/6-31+G(d,p)/SDD(Fe) optimized geometries.  $E_{\text{el}}$  for the complexes **s** is corrected for BSSE by the counterpoise method. All optimized geometries were obtained using M06-2X/6-31+G(d,p)/SDD(Fe).

| Molecular system <sup>[a]</sup>                                        | $E_{\text{el}}$ / hartree | ZPE / hartree | $T_c H$ / hartree | $E_{\text{el}}$ (MP2) / hartree |
|------------------------------------------------------------------------|---------------------------|---------------|-------------------|---------------------------------|
| Ferrocene                                                              | -510.790210               | 0.170426      | 0.179313          | ---                             |
| <b>1a</b> (R = H)                                                      | -741.762210               | 0.252570      | 0.266029          | ---                             |
| <b>1b</b> (R = Ph)                                                     | -972.732363               | 0.334154      | 0.353189          | ---                             |
| <b>1c</b> (R = OCH <sub>3</sub> )                                      | -856.244041               | 0.285544      | 0.302422          | ---                             |
| <b>1d</b> (R = CHO)                                                    | -855.049214               | 0.261947      | 0.278357          | ---                             |
| <b>2a</b> (R = H) (folded)                                             | -972.738341               | 0.334461      | 0.353165          | -969.815290                     |
| <b>2b</b> (R = Ph) (folded)                                            | -1434.686464              | 0.496813      | 0.524621          | -1430.528961                    |
| <b>2c</b> (R = OCH <sub>3</sub> ) (folded)                             | -1201.705875              | 0.401152      | 0.424383          | -1198.231814                    |
| <b>2d</b> (R = CHO) (folded)                                           | -1199.315624              | 0.353803      | 0.376443          | -1195.881669                    |
| Complex: <b>2a</b> (R = H) ... Na <sup>+</sup> (4.4 Å)                 | -1134.857315              | 0.335822      | 0.356347          | -1131.529874                    |
| Complex: <b>2b</b> (R = Ph) ... Na <sup>+</sup> (8.7 Å)                | -1596.806592              | 0.499353      | 0.528883          | -1592.244261                    |
| Complex: <b>2c</b> (R = OCH <sub>3</sub> ) ... Na <sup>+</sup> (4.3 Å) | -1363.824068              | 0.402030      | 0.426768          | -1359.947407                    |
| Complex: <b>2c</b> (R = OCH <sub>3</sub> ) ... Na <sup>+</sup> (7.3 Å) | -1363.823821              | 0.400518      | 0.426765          | -1359.960517                    |
| Complex: <b>2d</b> (R = CHO) ... Na <sup>+</sup> (8.9 Å)               | -1361.452006              | 0.355158      | 0.379732          | -1357.619386                    |
| Complex: <b>2d</b> (R = CHO) ... Li <sup>+</sup> (8.3 Å)               | -1206.721856              | 0.356609      | 0.380462          | -1203.228298                    |
| Complex: <b>2d</b> (R = CHO) ... NH <sub>4</sub> <sup>+</sup> (9.8 Å)  | -1256.253996              | 0.405067      | 0.431110          | -1252.676357                    |
| Li <sup>+</sup>                                                        | -7.281049                 | ---           | 0.002360          | -7.235485                       |
| Na <sup>+</sup>                                                        | -162.044508               | ---           | 0.002360          | -161.659283                     |
| NH <sub>4</sub> <sup>+</sup>                                           | -56.866871                | ---           | 0.053730          | -56.731035                      |

<sup>[a]</sup> For the complexes is presented, in parenthesis, the distance between Fe of the ferrocene and the cation,  $d(\text{Fe} \cdots \text{cation})$ .

**Table S8.** Electronic energies,  $E_{\text{el}}$ , and unscaled ZPE and  $T_c H$  (to 298.15 K), obtained at the M06-2X/6-31+G(d,p)/SDD(Fe) level of theory for the systems studied, and MP2/6-31+G(d,p)/SDD(Fe) electronic energies,  $E_{\text{el}}$  (MP2), obtained from a single point energy calculation on the M06-2X/6-31+G(d,p)/SDD(Fe) optimized geometries, in  $\text{CH}_2\text{Cl}_2$  and EtOH using the Polarizable Continuum Model (PCM) as a self-consistent reaction field. The optimized geometries were obtained in solution (PCM) using M06-2X/6-31+G(d,p)/SDD(Fe). Below are presented the solvation enthalpies, at  $T = 298.15$  K, for each species, calculated at the M06-2X/6-31+G(d,p)/SDD(Fe) level.

| Molecular system <sup>[a]</sup>                                                       | $E_{\text{el}}$ / hartree | ZPE / hartree | $T_c H$ / hartree | $E_{\text{el}}$ (MP2) / hartree |
|---------------------------------------------------------------------------------------|---------------------------|---------------|-------------------|---------------------------------|
| $\text{Na}^+$ in $\text{CH}_2\text{Cl}_2$                                             | -162.187814               | —             | 0.002360          | -161.802551                     |
| $\text{Na}^+$ in EtOH                                                                 | -162.199392               | —             | 0.002360          | -161.814126                     |
| <b>2d</b> (R = CHO) (folded) in $\text{CH}_2\text{Cl}_2$                              | -1199.329141              | 0.353672      | 0.376320          | -1195.892664                    |
| <b>2d</b> (R = CHO) (folded) in EtOH                                                  | -1199.331155              | 0.353673      | 0.376316          | -1195.894189                    |
| Complex: <b>2d</b> (R = CHO) $\cdots \text{Na}^+$ (9.3 Å) in $\text{CH}_2\text{Cl}_2$ | -1361.533493              | 0.354910      | 0.379452          | -1357.698645                    |
| Complex: <b>2d</b> (R = CHO) $\cdots \text{Na}^+$ (9.4 Å) in EtOH                     | -1361.541705              | 0.354489      | 0.379277          | -1357.705672                    |

| Solvent                  | Molecular system                                  | $\Delta_{\text{solv}} H_m / \text{kJ}\cdot\text{mol}^{-1}$ |
|--------------------------|---------------------------------------------------|------------------------------------------------------------|
|                          | $\text{Na}^+$                                     | -376                                                       |
| $\text{CH}_2\text{Cl}_2$ | <b>2d</b> (R = CHO) (folded)                      | -36                                                        |
|                          | Complex: <b>2d</b> (R = CHO) $\cdots \text{Na}^+$ | -211                                                       |
|                          | $\text{Na}^+$                                     | -407                                                       |
| EtOH                     | <b>2d</b> (R = CHO) (folded)                      | -41                                                        |
|                          | Complex: <b>2d</b> (R = CHO) $\cdots \text{Na}^+$ | -234                                                       |

### 3.3. Optimized geometries.

Geometries obtained at the M06-2X/6-31+G(d,p)/SDD(Fe) level of theory.

**2a** (R = H),  $d(\text{Fe}\cdots\text{Na}) = 4.4 \text{ \AA}$

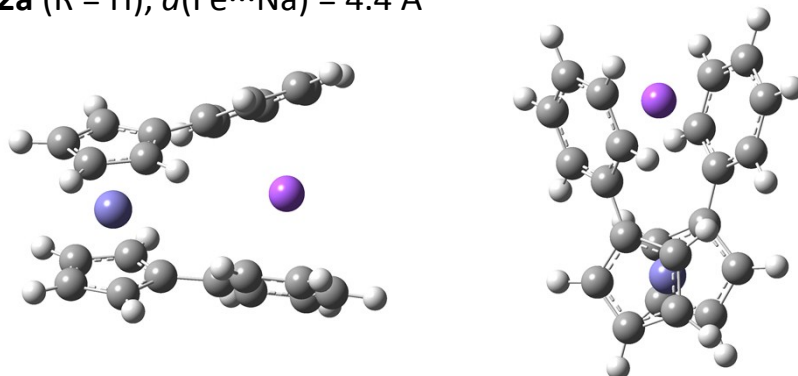

**2b** (R = Ph),  $d(\text{Fe}\cdots\text{Na}) = 4.4 \text{ \AA}$

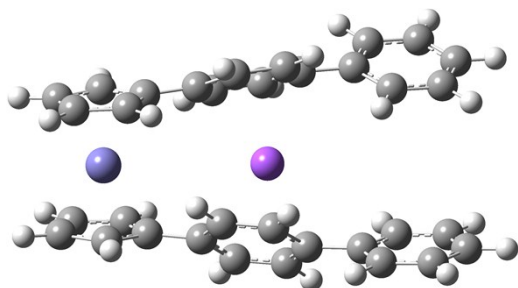

**2b** (R = Ph),  $d(\text{Fe}\cdots\text{Na}) = 8.7 \text{ \AA}$

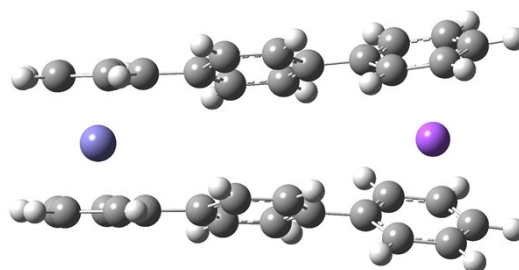

**2c** (R = OCH<sub>3</sub>),  $d(\text{Fe}\cdots\text{Na}) = 4.3 \text{ \AA}$

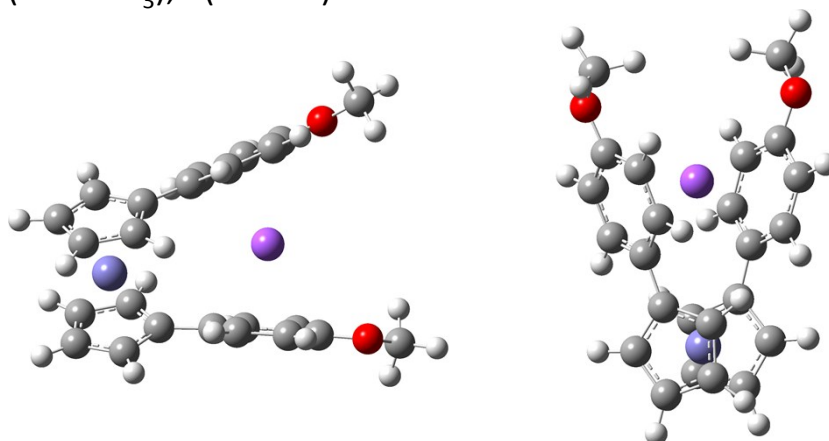

**2c** (R = OCH<sub>3</sub>),  $d(\text{Fe}\cdots\text{Na}) = 7.3 \text{ \AA}$

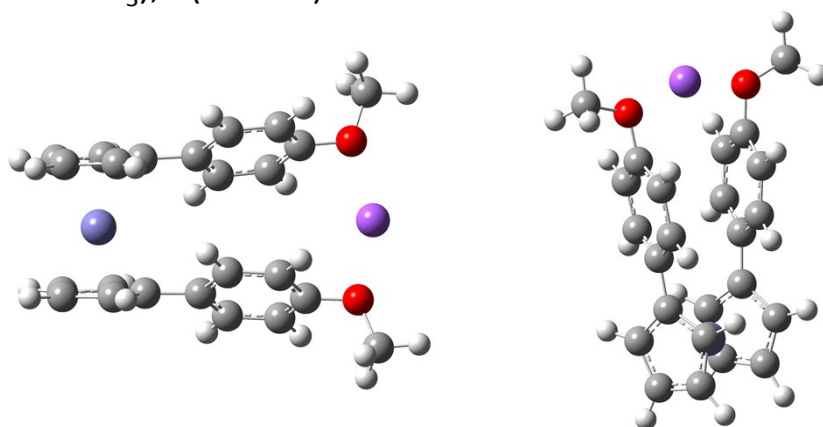

**2d** (R = CHO),  $d(\text{Fe}\cdots\text{Li}) = 8.3 \text{ \AA}$

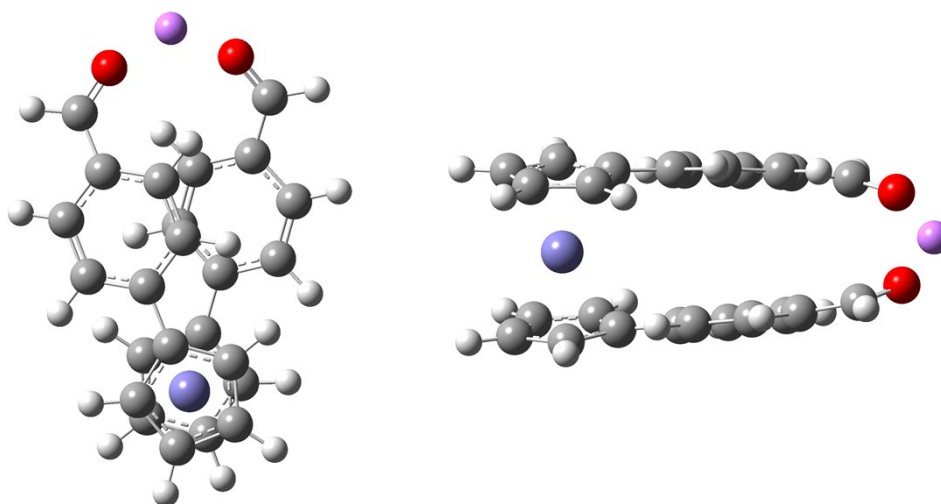

**2d** (R = CHO),  $d(\text{Fe}\cdots\text{NH}_4) = 9.8 \text{ \AA}$

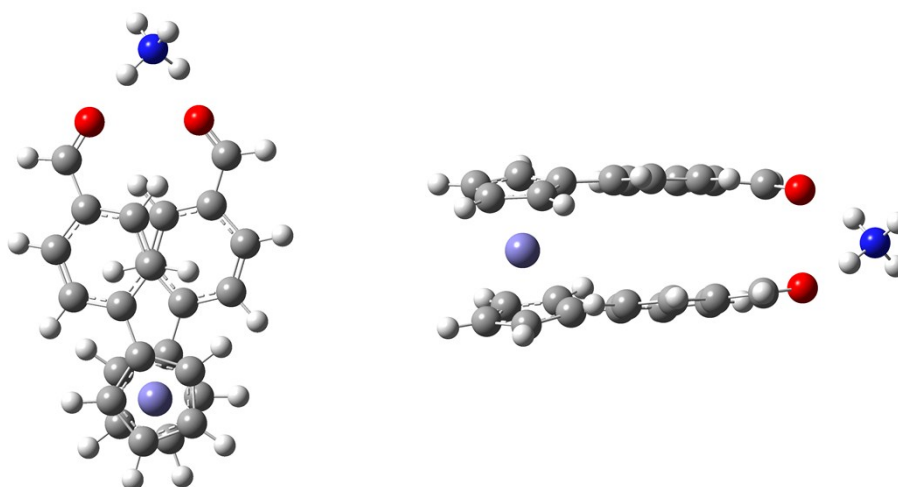

**Table S9.** Optimized geometries in Cartesian coordinates for the molecular systems considered, obtained at the M06-2X/6-31+G(d,p)/SDD(Fe) level of theory.

**A) 1,1'-Diphenylferrocene**

|    |   |           |           |           |
|----|---|-----------|-----------|-----------|
| 6  | 0 | -2.927498 | -1.717260 | 0.727048  |
| 6  | 0 | -2.849763 | -1.777427 | -0.690453 |
| 6  | 0 | -1.476888 | -1.806193 | -1.051773 |
| 6  | 0 | -0.695773 | -1.765910 | 0.140533  |
| 6  | 0 | -1.603982 | -1.705346 | 1.238301  |
| 1  | 0 | -3.834607 | -1.660284 | 1.312720  |
| 1  | 0 | -3.687166 | -1.761451 | -1.374140 |
| 1  | 0 | -1.084655 | -1.805545 | -2.060487 |
| 1  | 0 | -1.324495 | -1.657422 | 2.282226  |
| 26 | 0 | -1.904997 | -0.000001 | -0.000001 |
| 6  | 0 | -2.927502 | 1.717258  | -0.727046 |
| 6  | 0 | -2.849766 | 1.777422  | 0.690455  |
| 6  | 0 | -1.603986 | 1.705348  | -1.238301 |
| 1  | 0 | -3.834612 | 1.660282  | -1.312718 |
| 6  | 0 | -1.476890 | 1.806189  | 1.051774  |
| 1  | 0 | -3.687168 | 1.761442  | 1.374143  |
| 6  | 0 | -0.695776 | 1.765911  | -0.140533 |
| 1  | 0 | -1.324501 | 1.657426  | -2.282226 |
| 1  | 0 | -1.084657 | 1.805539  | 2.060487  |
| 6  | 0 | 0.777536  | -1.784671 | 0.222692  |
| 6  | 0 | 1.450212  | -1.124030 | 1.259508  |
| 6  | 0 | 1.531425  | -2.465512 | -0.738943 |
| 6  | 0 | 2.838420  | -1.141476 | 1.329392  |
| 1  | 0 | 0.878146  | -0.559886 | 1.992168  |
| 6  | 0 | 2.923633  | -2.481841 | -0.671067 |
| 1  | 0 | 1.021288  | -2.998730 | -1.536449 |
| 6  | 0 | 3.581776  | -1.821088 | 0.363751  |
| 1  | 0 | 3.343278  | -0.605600 | 2.127433  |
| 1  | 0 | 3.492524  | -3.017767 | -1.425037 |
| 6  | 0 | 0.777532  | 1.784673  | -0.222692 |
| 6  | 0 | 1.450209  | 1.124032  | -1.259508 |
| 6  | 0 | 1.531421  | 2.465514  | 0.738943  |
| 6  | 0 | 2.838417  | 1.141479  | -1.329393 |
| 1  | 0 | 0.878143  | 0.559888  | -1.992169 |
| 6  | 0 | 2.923629  | 2.481843  | 0.671067  |
| 1  | 0 | 1.021284  | 2.998732  | 1.536449  |
| 6  | 0 | 3.581772  | 1.821090  | -0.363751 |
| 1  | 0 | 3.343275  | 0.605604  | -2.127433 |
| 1  | 0 | 3.492520  | 3.017770  | 1.425037  |
| 1  | 0 | 4.666196  | -1.828438 | 0.415426  |
| 1  | 0 | 4.666192  | 1.828442  | -0.415426 |

**B) 1,1'-Bis([1,1'-diphenyl]-4-yl)ferrocene**

|   |   |          |          |           |
|---|---|----------|----------|-----------|
| 6 | 0 | 4.990099 | 1.822565 | 0.406239  |
| 6 | 0 | 4.914599 | 1.625937 | -0.998785 |
| 6 | 0 | 3.542431 | 1.585849 | -1.361309 |
| 6 | 0 | 2.759035 | 1.758121 | -0.182467 |
| 6 | 0 | 3.665860 | 1.899554 | 0.909463  |
| 1 | 0 | 5.896216 | 1.870972 | 0.994050  |
| 1 | 0 | 5.752229 | 1.489556 | -1.668639 |
| 1 | 0 | 3.152131 | 1.405036 | -2.354467 |
| 1 | 0 | 3.385543 | 2.039124 | 1.944844  |

|    |   |           |           |           |
|----|---|-----------|-----------|-----------|
| 26 | 0 | 3.971030  | -0.000144 | -0.000067 |
| 6  | 0 | 4.989743  | -1.823089 | -0.406288 |
| 6  | 0 | 4.914348  | -1.626334 | 0.998722  |
| 6  | 0 | 3.665464  | -1.899869 | -0.909442 |
| 1  | 0 | 5.895827  | -1.871700 | -0.994132 |
| 6  | 0 | 3.542204  | -1.585946 | 1.361312  |
| 1  | 0 | 5.752039  | -1.490026 | 1.668517  |
| 6  | 0 | 2.758724  | -1.758184 | 0.182522  |
| 1  | 0 | 3.385063  | -2.039503 | -1.944792 |
| 1  | 0 | 3.151982  | -1.404966 | 2.354470  |
| 6  | 0 | 1.286663  | 1.777501  | -0.103700 |
| 6  | 0 | 0.619410  | 1.334479  | 1.045593  |
| 6  | 0 | 0.518035  | 2.236870  | -1.178067 |
| 6  | 0 | -0.766855 | 1.348973  | 1.116148  |
| 1  | 0 | 1.194745  | 0.930969  | 1.875506  |
| 6  | 0 | -0.872030 | 2.245591  | -1.109510 |
| 1  | 0 | 1.014255  | 2.614020  | -2.068076 |
| 6  | 0 | -1.538637 | 1.803076  | 0.038414  |
| 1  | 0 | -1.261543 | 0.961710  | 2.003410  |
| 1  | 0 | -1.448617 | 2.630249  | -1.946549 |
| 6  | 0 | 1.286339  | -1.777294 | 0.103805  |
| 6  | 0 | 0.619115  | -1.334106 | -1.045437 |
| 6  | 0 | 0.517684  | -2.236663 | 1.178156  |
| 6  | 0 | -0.767153 | -1.348490 | -1.115976 |
| 1  | 0 | 1.194472  | -0.930555 | -1.875315 |
| 6  | 0 | -0.872383 | -2.245343 | 1.109594  |
| 1  | 0 | 1.013893  | -2.613888 | 2.068140  |
| 6  | 0 | -1.538951 | -1.802742 | -0.038324 |
| 1  | 0 | -1.261854 | -0.961123 | -2.003189 |
| 1  | 0 | -1.448997 | -2.630023 | 1.946604  |
| 6  | 0 | -3.019815 | 1.816946  | 0.113285  |
| 6  | 0 | -3.672168 | 2.221022  | 1.284394  |
| 6  | 0 | -3.796742 | 1.428084  | -0.986077 |
| 6  | 0 | -5.063621 | 2.244532  | 1.352572  |
| 1  | 0 | -3.082842 | 2.544152  | 2.138280  |
| 6  | 0 | -5.186046 | 1.453375  | -0.919925 |
| 1  | 0 | -3.305062 | 1.072709  | -1.888092 |
| 6  | 0 | -5.825191 | 1.865081  | 0.249112  |
| 1  | 0 | -5.552528 | 2.571252  | 2.265674  |
| 1  | 0 | -5.770898 | 1.131205  | -1.776134 |
| 1  | 0 | -6.909592 | 1.881417  | 0.301466  |
| 6  | 0 | -3.020116 | -1.816734 | -0.113254 |
| 6  | 0 | -3.672337 | -2.220932 | -1.284390 |
| 6  | 0 | -3.797150 | -1.427875 | 0.986029  |
| 6  | 0 | -5.063789 | -2.244642 | -1.352651 |
| 1  | 0 | -3.082925 | -2.544016 | -2.138233 |
| 6  | 0 | -5.186443 | -1.453369 | 0.919791  |
| 1  | 0 | -3.305562 | -1.072356 | 1.888038  |
| 6  | 0 | -5.825477 | -1.865265 | -0.249247 |
| 1  | 0 | -5.552587 | -2.571472 | -2.265773 |
| 1  | 0 | -5.771379 | -1.131249 | 1.775961  |
| 1  | 0 | -6.909873 | -1.881823 | -0.301636 |

**C) 1,1'-Bis(4-methoxyphenyl)ferrocene**

|   |   |           |          |           |
|---|---|-----------|----------|-----------|
| 6 | 0 | -3.797268 | 1.776090 | -0.511422 |
| 6 | 0 | -3.630082 | 1.716136 | 0.897837  |
| 6 | 0 | -2.236609 | 1.712891 | 1.171627  |
| 6 | 0 | -1.531491 | 1.774600 | -0.065700 |
| 6 | 0 | -2.507862 | 1.807943 | -1.104621 |

|    |   |           |           |           |
|----|---|-----------|-----------|-----------|
| 1  | 0 | -4.739433 | 1.766988  | -1.041785 |
| 1  | 0 | -4.421700 | 1.641586  | 1.630536  |
| 1  | 0 | -1.781522 | 1.626213  | 2.149850  |
| 1  | 0 | -2.295833 | 1.845736  | -2.164757 |
| 26 | 0 | -2.742715 | -0.000011 | 0.000006  |
| 6  | 0 | -3.797232 | -1.776141 | 0.511441  |
| 6  | 0 | -3.630052 | -1.716188 | -0.897818 |
| 6  | 0 | -2.507821 | -1.807961 | 1.104638  |
| 1  | 0 | -4.739397 | -1.767068 | 1.041803  |
| 6  | 0 | -2.236580 | -1.712906 | -1.171614 |
| 1  | 0 | -4.421671 | -1.641662 | -1.630518 |
| 6  | 0 | -1.531459 | -1.774606 | 0.065711  |
| 1  | 0 | -2.295780 | -1.845745 | 2.164771  |
| 1  | 0 | -1.781498 | -1.626205 | -2.149838 |
| 6  | 0 | -0.066279 | 1.757529  | -0.236983 |
| 6  | 0 | 0.517267  | 1.133332  | -1.350765 |
| 6  | 0 | 0.782400  | 2.322610  | 0.713946  |
| 6  | 0 | 1.890481  | 1.056823  | -1.491876 |
| 1  | 0 | -0.122176 | 0.661824  | -2.093172 |
| 6  | 0 | 2.172397  | 2.240993  | 0.595061  |
| 1  | 0 | 0.355189  | 2.832550  | 1.573355  |
| 6  | 0 | 2.728189  | 1.588014  | -0.504569 |
| 1  | 0 | 2.343887  | 0.546262  | -2.335599 |
| 1  | 0 | 2.799052  | 2.672039  | 1.367053  |
| 6  | 0 | -0.066241 | -1.757493 | 0.236965  |
| 6  | 0 | 0.517326  | -1.133354 | 1.350761  |
| 6  | 0 | 0.782423  | -2.322516 | -0.714015 |
| 6  | 0 | 1.890546  | -1.056879 | 1.491871  |
| 1  | 0 | -0.122100 | -0.661912 | 2.093223  |
| 6  | 0 | 2.172420  | -2.240924 | -0.595141 |
| 1  | 0 | 0.355188  | -2.832399 | -1.573446 |
| 6  | 0 | 2.728247  | -1.588033 | 0.504541  |
| 1  | 0 | 2.343952  | -0.546394 | 2.335641  |
| 1  | 0 | 2.799057  | -2.671968 | -1.367143 |
| 8  | 0 | 4.063143  | 1.401626  | -0.702443 |
| 8  | 0 | 4.063215  | -1.401679 | 0.702462  |
| 6  | 0 | 4.929421  | 1.719617  | 0.367530  |
| 1  | 0 | 4.659849  | 1.148324  | 1.264141  |
| 1  | 0 | 5.929962  | 1.434281  | 0.040903  |
| 1  | 0 | 4.916912  | 2.794097  | 0.586074  |
| 6  | 0 | 4.929602  | -1.719511 | -0.367480 |
| 1  | 0 | 4.659980  | -1.148273 | -1.264105 |
| 1  | 0 | 5.930073  | -1.433977 | -0.040815 |
| 1  | 0 | 4.917286  | -2.793994 | -0.586030 |

**D) 4,4'-(Ferrocen-1,1'-diyl)dibenzaldehyde**

|    |   |           |           |           |
|----|---|-----------|-----------|-----------|
| 6  | 0 | -3.678102 | 1.682619  | -0.812199 |
| 6  | 0 | -3.613325 | 1.805997  | 0.602045  |
| 6  | 0 | -2.245620 | 1.854763  | 0.974895  |
| 6  | 0 | -1.453161 | 1.761420  | -0.207933 |
| 6  | 0 | -2.351601 | 1.649576  | -1.311149 |
| 1  | 0 | -4.580031 | 1.599482  | -1.402572 |
| 1  | 0 | -4.456979 | 1.820280  | 1.277905  |
| 1  | 0 | -1.865314 | 1.902285  | 1.986752  |
| 1  | 0 | -2.065779 | 1.557459  | -2.350258 |
| 26 | 0 | -2.656633 | -0.000002 | 0.000002  |
| 6  | 0 | -3.678089 | -1.682630 | 0.812204  |
| 6  | 0 | -3.613316 | -1.806006 | -0.602041 |
| 6  | 0 | -2.351586 | -1.649583 | 1.311148  |

|   |   |           |           |           |
|---|---|-----------|-----------|-----------|
| 1 | 0 | -4.580017 | -1.599498 | 1.402580  |
| 6 | 0 | -2.245613 | -1.854760 | -0.974896 |
| 1 | 0 | -4.456972 | -1.820292 | -1.277899 |
| 6 | 0 | -1.453150 | -1.761418 | 0.207929  |
| 1 | 0 | -2.065761 | -1.557467 | 2.350257  |
| 1 | 0 | -1.865309 | -1.902276 | -1.986755 |
| 6 | 0 | 0.018891  | 1.764109  | -0.273396 |
| 6 | 0 | 0.692246  | 1.109457  | -1.313973 |
| 6 | 0 | 0.770622  | 2.416415  | 0.716913  |
| 6 | 0 | 2.080251  | 1.095812  | -1.355595 |
| 1 | 0 | 0.121606  | 0.573825  | -2.067843 |
| 6 | 0 | 2.157565  | 2.390936  | 0.685489  |
| 1 | 0 | 0.255820  | 2.949972  | 1.510443  |
| 6 | 0 | 2.819366  | 1.725317  | -0.351127 |
| 1 | 0 | 2.598322  | 0.564400  | -2.151302 |
| 1 | 0 | 2.749046  | 2.880974  | 1.453525  |
| 6 | 0 | 0.018903  | -1.764100 | 0.273388  |
| 6 | 0 | 0.692257  | -1.109523 | 1.314013  |
| 6 | 0 | 0.770633  | -2.416346 | -0.716961 |
| 6 | 0 | 2.080261  | -1.095890 | 1.355641  |
| 1 | 0 | 0.121616  | -0.573959 | 2.067930  |
| 6 | 0 | 2.157577  | -2.390861 | -0.685539 |
| 1 | 0 | 0.255830  | -2.949848 | -1.510528 |
| 6 | 0 | 2.819376  | -1.725320 | 0.351127  |
| 1 | 0 | 2.598333  | -0.564545 | 2.151393  |
| 1 | 0 | 2.749059  | -2.880850 | -1.453605 |
| 6 | 0 | 4.297360  | 1.642945  | -0.366581 |
| 8 | 0 | 5.009409  | 2.072926  | 0.515355  |
| 1 | 0 | 4.736818  | 1.132992  | -1.248319 |
| 6 | 0 | 4.297371  | -1.642955 | 0.366594  |
| 8 | 0 | 5.009425  | -2.072892 | -0.515361 |
| 1 | 0 | 4.736823  | -1.133000 | 1.248333  |

**E) 1,1'-Diphenylferrocene...Na<sup>+</sup> (4.4 Å) complex**

|    |   |           |           |           |
|----|---|-----------|-----------|-----------|
| 6  | 0 | 3.123419  | -1.760579 | 0.302923  |
| 6  | 0 | 2.725116  | -1.238998 | 1.562829  |
| 6  | 0 | 1.309371  | -1.245676 | 1.613681  |
| 6  | 0 | 0.822163  | -1.767170 | 0.377344  |
| 6  | 0 | 1.956122  | -2.082379 | -0.431635 |
| 1  | 0 | 4.140303  | -1.866898 | -0.048105 |
| 1  | 0 | 3.385965  | -0.868571 | 2.333955  |
| 1  | 0 | 0.702738  | -0.887556 | 2.435779  |
| 1  | 0 | 1.926600  | -2.503786 | -1.427577 |
| 26 | 0 | 1.956121  | -0.000216 | 0.000060  |
| 6  | 0 | 3.124011  | 1.759863  | -0.302883 |
| 6  | 0 | 2.725464  | 1.238801  | -1.562807 |
| 6  | 0 | 1.956700  | 2.082008  | 0.431518  |
| 1  | 0 | 4.140885  | 1.866297  | 0.048096  |
| 6  | 0 | 1.309749  | 1.245824  | -1.613645 |
| 1  | 0 | 3.385944  | 0.868288  | -2.334212 |
| 6  | 0 | 0.822553  | 1.766972  | -0.377287 |
| 1  | 0 | 1.927142  | 2.503127  | 1.427582  |
| 1  | 0 | 0.703165  | 0.887683  | -2.435792 |
| 6  | 0 | -0.586913 | -1.988522 | 0.011137  |
| 6  | 0 | -1.014315 | -1.896421 | -1.326531 |
| 6  | 0 | -1.533321 | -2.343810 | 0.988978  |
| 6  | 0 | -2.339421 | -2.163520 | -1.677020 |
| 1  | 0 | -0.295837 | -1.619528 | -2.093460 |
| 6  | 0 | -2.862851 | -2.602460 | 0.640385  |



|    |   |           |           |           |
|----|---|-----------|-----------|-----------|
| 1  | 0 | -1.213679 | -2.457616 | 2.020620  |
| 6  | 0 | -3.272863 | -2.514760 | -0.694113 |
| 1  | 0 | -2.642609 | -2.107965 | -2.717991 |
| 1  | 0 | -3.570737 | -2.900850 | 1.407678  |
| 6  | 0 | -0.586410 | 1.988726  | -0.010930 |
| 6  | 0 | -1.013958 | 1.895660  | 1.326609  |
| 6  | 0 | -1.532568 | 2.345164  | -0.988635 |
| 6  | 0 | -2.339089 | 2.162740  | 1.677116  |
| 1  | 0 | -0.295645 | 1.618061  | 2.093451  |
| 6  | 0 | -2.862081 | 2.603881  | -0.640022 |
| 1  | 0 | -1.212667 | 2.459723  | -2.020121 |
| 6  | 0 | -3.272288 | 2.515049  | 0.694371  |
| 1  | 0 | -2.642462 | 2.106347  | 2.718002  |
| 1  | 0 | -3.569814 | 2.903157  | -1.407119 |
| 1  | 0 | -4.298002 | -2.741836 | -0.967832 |
| 1  | 0 | -4.297444 | 2.742029  | 0.968149  |
| 11 | 0 | -2.462229 | 0.000287  | -0.000997 |

**F) 1,1'-Bis([1,1'-diphenyl]-4-yl)ferrocene...Na<sup>+</sup> (8.7 Å) complex**

|    |   |           |           |           |
|----|---|-----------|-----------|-----------|
| 6  | 0 | 5.067338  | -1.443710 | -1.270028 |
| 6  | 0 | 5.194840  | -1.851412 | 0.084726  |
| 6  | 0 | 3.892826  | -2.019672 | 0.616831  |
| 6  | 0 | 2.944879  | -1.717530 | -0.408424 |
| 6  | 0 | 3.686868  | -1.358195 | -1.575460 |
| 1  | 0 | 5.880442  | -1.210914 | -1.943212 |
| 1  | 0 | 6.122123  | -1.975441 | 0.626342  |
| 1  | 0 | 3.665253  | -2.287647 | 1.639669  |
| 1  | 0 | 3.272769  | -1.065683 | -2.530574 |
| 26 | 0 | 4.141079  | 0.000577  | -0.002316 |
| 6  | 0 | 5.069481  | 1.447213  | 1.260201  |
| 6  | 0 | 5.188702  | 1.855238  | -0.095374 |
| 6  | 0 | 3.690755  | 1.357644  | 1.573145  |
| 1  | 0 | 5.886958  | 1.216908  | 1.928937  |
| 6  | 0 | 3.883280  | 2.020683  | -0.620217 |
| 1  | 0 | 6.112810  | 1.980823  | -0.642065 |
| 6  | 0 | 2.942140  | 1.715915  | 0.410135  |
| 1  | 0 | 3.280869  | 1.066769  | 2.530684  |
| 1  | 0 | 3.647033  | 2.285548  | -1.642039 |
| 6  | 0 | 1.479263  | -1.768819 | -0.283700 |
| 6  | 0 | 0.641517  | -1.186021 | -1.246911 |
| 6  | 0 | 0.878772  | -2.429153 | 0.796320  |
| 6  | 0 | -0.739008 | -1.287051 | -1.148599 |
| 1  | 0 | 1.076124  | -0.635480 | -2.075800 |
| 6  | 0 | -0.503205 | -2.510263 | 0.909644  |
| 1  | 0 | 1.499189  | -2.916180 | 1.541563  |
| 6  | 0 | -1.334170 | -1.951525 | -0.067781 |
| 1  | 0 | -1.360485 | -0.816283 | -1.907813 |
| 1  | 0 | -0.937823 | -3.063027 | 1.738175  |
| 6  | 0 | 1.476237  | 1.768326  | 0.292784  |
| 6  | 0 | 0.640676  | 1.129133  | 1.221132  |
| 6  | 0 | 0.873059  | 2.489813  | -0.745538 |
| 6  | 0 | -0.740218 | 1.225649  | 1.125308  |
| 1  | 0 | 1.078132  | 0.530389  | 2.014617  |
| 6  | 0 | -0.508947 | 2.575290  | -0.851090 |
| 1  | 0 | 1.492411  | 3.024616  | -1.458282 |
| 6  | 0 | -1.340327 | 1.952473  | 0.087261  |
| 1  | 0 | -1.357008 | 0.699253  | 1.850430  |
| 1  | 0 | -0.940639 | 3.183056  | -1.641276 |
| 6  | 0 | -2.803136 | -2.099221 | 0.037195  |

|    |   |           |           |           |
|----|---|-----------|-----------|-----------|
| 6  | 0 | -3.585995 | -2.383098 | -1.098341 |
| 6  | 0 | -3.454347 | -2.000739 | 1.281762  |
| 6  | 0 | -4.966064 | -2.575674 | -0.990313 |
| 1  | 0 | -3.099249 | -2.501352 | -2.062069 |
| 6  | 0 | -4.833174 | -2.198943 | 1.392257  |
| 1  | 0 | -2.871133 | -1.769915 | 2.168907  |
| 6  | 0 | -5.597296 | -2.487014 | 0.256035  |
| 1  | 0 | -5.544369 | -2.825835 | -1.874388 |
| 1  | 0 | -5.309366 | -2.134756 | 2.365926  |
| 1  | 0 | -6.664655 | -2.661805 | 0.343331  |
| 6  | 0 | -2.810513 | 2.099102  | -0.008523 |
| 6  | 0 | -3.612900 | 2.176487  | 1.146638  |
| 6  | 0 | -3.449073 | 2.205405  | -1.259984 |
| 6  | 0 | -4.993808 | 2.367734  | 1.054764  |
| 1  | 0 | -3.142607 | 2.132397  | 2.124395  |
| 6  | 0 | -4.828462 | 2.409102  | -1.353598 |
| 1  | 0 | -2.856699 | 2.135611  | -2.167686 |
| 6  | 0 | -5.610430 | 2.489408  | -0.195863 |
| 1  | 0 | -5.584995 | 2.450572  | 1.961633  |
| 1  | 0 | -5.291111 | 2.513350  | -2.330385 |
| 1  | 0 | -6.678613 | 2.666677  | -0.266009 |
| 11 | 0 | -4.552798 | -0.012373 | -0.199196 |

**G) 1,1'-Bis(4-methoxyphenyl)ferrocene...Na<sup>+</sup> (4.3 Å) complex**

|    |   |           |           |           |
|----|---|-----------|-----------|-----------|
| 6  | 0 | 3.867366  | -1.736680 | 0.439331  |
| 6  | 0 | 3.469661  | -1.119425 | 1.654520  |
| 6  | 0 | 2.052799  | -1.117628 | 1.702934  |
| 6  | 0 | 1.565290  | -1.735222 | 0.512340  |
| 6  | 0 | 2.698996  | -2.114223 | -0.267423 |
| 1  | 0 | 4.883990  | -1.869541 | 0.096885  |
| 1  | 0 | 4.130536  | -0.692924 | 2.396190  |
| 1  | 0 | 1.447030  | -0.692243 | 2.493253  |
| 1  | 0 | 2.670441  | -2.610894 | -1.228128 |
| 26 | 0 | 2.706548  | -0.001198 | 0.003474  |
| 6  | 0 | 3.876321  | 1.728428  | -0.426989 |
| 6  | 0 | 3.478729  | 1.115855  | -1.644579 |
| 6  | 0 | 2.707635  | 2.109619  | 0.278190  |
| 1  | 0 | 4.892686  | 1.855799  | -0.081692 |
| 6  | 0 | 2.061814  | 1.121245  | -1.696718 |
| 1  | 0 | 4.139582  | 0.687708  | -2.385338 |
| 6  | 0 | 1.574694  | 1.737812  | -0.505792 |
| 1  | 0 | 2.676795  | 2.603111  | 1.240555  |
| 1  | 0 | 1.454285  | 0.699971  | -2.488047 |
| 6  | 0 | 0.155130  | -1.989281 | 0.167135  |
| 6  | 0 | -0.274668 | -2.047771 | -1.175414 |
| 6  | 0 | -0.800361 | -2.234726 | 1.161451  |
| 6  | 0 | -1.591665 | -2.345850 | -1.504128 |
| 1  | 0 | 0.442157  | -1.858627 | -1.970123 |
| 6  | 0 | -2.136466 | -2.525458 | 0.849540  |
| 1  | 0 | -0.495960 | -2.231898 | 2.204103  |
| 6  | 0 | -2.536984 | -2.603463 | -0.491860 |
| 1  | 0 | -1.913979 | -2.413295 | -2.538360 |
| 1  | 0 | -2.833990 | -2.731314 | 1.653094  |
| 6  | 0 | 0.164245  | 1.992813  | -0.161587 |
| 6  | 0 | -0.282800 | 1.966089  | 1.175929  |
| 6  | 0 | -0.773079 | 2.316997  | -1.150222 |
| 6  | 0 | -1.601025 | 2.255763  | 1.506437  |
| 1  | 0 | 0.422063  | 1.712377  | 1.963330  |
| 6  | 0 | -2.110401 | 2.602008  | -0.837056 |

|    |   |           |           |           |
|----|---|-----------|-----------|-----------|
| 1  | 0 | -0.451911 | 2.380471  | -2.186038 |
| 6  | 0 | -2.528793 | 2.592307  | 0.501232  |
| 1  | 0 | -1.937971 | 2.255035  | 2.538237  |
| 1  | 0 | -2.793589 | 2.872401  | -1.633788 |
| 8  | 0 | -3.783565 | -2.898183 | -0.907434 |
| 8  | 0 | -3.778057 | 2.871435  | 0.919197  |
| 6  | 0 | -4.747860 | -3.277485 | 0.066549  |
| 1  | 0 | -4.959726 | -2.450051 | 0.753406  |
| 1  | 0 | -5.648547 | -3.527434 | -0.490268 |
| 1  | 0 | -4.407857 | -4.152756 | 0.629360  |
| 6  | 0 | -4.726275 | 3.320950  | -0.040888 |
| 1  | 0 | -4.930053 | 2.543441  | -0.785902 |
| 1  | 0 | -5.634526 | 3.536781  | 0.517988  |
| 1  | 0 | -4.373957 | 4.231006  | -0.537119 |
| 11 | 0 | -1.638963 | 0.001996  | -0.093058 |

**H) 1,1'-Bis(4-methoxyphenyl)ferrocene...Na<sup>+</sup> (7.3 Å) complex**

|    |   |           |           |           |
|----|---|-----------|-----------|-----------|
| 6  | 0 | -3.968203 | 1.827595  | -0.344168 |
| 6  | 0 | -3.863332 | 1.600635  | 1.054183  |
| 6  | 0 | -2.486488 | 1.557125  | 1.390884  |
| 6  | 0 | -1.729422 | 1.751741  | 0.197689  |
| 6  | 0 | -2.657351 | 1.917417  | -0.874822 |
| 1  | 0 | -4.886767 | 1.890701  | -0.910521 |
| 1  | 0 | -4.687238 | 1.449693  | 1.737557  |
| 1  | 0 | -2.080733 | 1.362727  | 2.375476  |
| 1  | 0 | -2.400737 | 2.087703  | -1.911925 |
| 26 | 0 | -2.925762 | 0.000774  | -0.000772 |
| 6  | 0 | -3.969806 | -1.824772 | 0.344503  |
| 6  | 0 | -3.864691 | -1.599744 | -1.054127 |
| 6  | 0 | -2.659062 | -1.914968 | 0.875357  |
| 1  | 0 | -4.888425 | -1.886275 | 0.910947  |
| 6  | 0 | -2.487798 | -1.557829 | -1.390805 |
| 1  | 0 | -4.688387 | -1.448994 | -1.737792 |
| 6  | 0 | -1.730951 | -1.751461 | -0.197289 |
| 1  | 0 | -2.402740 | -2.083773 | 1.912776  |
| 1  | 0 | -2.081708 | -1.365261 | -2.375614 |
| 6  | 0 | -0.261947 | 1.806965  | 0.083285  |
| 6  | 0 | 0.386173  | 1.371175  | -1.080503 |
| 6  | 0 | 0.513978  | 2.329688  | 1.126440  |
| 6  | 0 | 1.765422  | 1.488427  | -1.217675 |
| 1  | 0 | -0.197202 | 0.931414  | -1.885136 |
| 6  | 0 | 1.897481  | 2.435370  | 1.010406  |
| 1  | 0 | 0.025277  | 2.683492  | 2.029208  |
| 6  | 0 | 2.508771  | 2.028201  | -0.171022 |
| 1  | 0 | 2.263919  | 1.178964  | -2.133283 |
| 1  | 0 | 2.496246  | 2.853425  | 1.814790  |
| 6  | 0 | -0.263505 | -1.807423 | -0.082907 |
| 6  | 0 | 0.384914  | -1.370023 | 1.080256  |
| 6  | 0 | 0.512005  | -2.332105 | -1.125251 |
| 6  | 0 | 1.764067  | -1.486963 | 1.217455  |
| 1  | 0 | -0.198312 | -0.928535 | 1.884044  |
| 6  | 0 | 1.895551  | -2.438360 | -1.008912 |
| 1  | 0 | 0.023131  | -2.687352 | -2.027348 |
| 6  | 0 | 2.507024  | -2.029138 | 0.171685  |
| 1  | 0 | 2.263173  | -1.174758 | 2.131739  |
| 1  | 0 | 2.494117  | -2.858988 | -1.812127 |
| 8  | 0 | 3.898621  | 2.116884  | -0.305456 |
| 8  | 0 | 3.896958  | -2.118600 | 0.305615  |
| 6  | 0 | 4.365560  | 3.427243  | -0.666713 |

|    |   |          |           |           |
|----|---|----------|-----------|-----------|
| 1  | 0 | 4.085913 | 4.147921  | 0.106072  |
| 1  | 0 | 5.450727 | 3.367899  | -0.746537 |
| 1  | 0 | 3.930899 | 3.720858  | -1.626218 |
| 6  | 0 | 4.361257 | -3.424132 | 0.687255  |
| 1  | 0 | 4.076153 | -4.156399 | -0.072423 |
| 1  | 0 | 5.446850 | -3.367175 | 0.762387  |
| 1  | 0 | 3.929072 | -3.700263 | 1.652980  |
| 11 | 0 | 4.383097 | -0.004672 | -0.019224 |

**l) 4,4'-(Ferrocen-1,1'-diyl)dibenzaldehyde...Li<sup>+</sup> (8.3 Å) complex**

|    |   |           |           |           |
|----|---|-----------|-----------|-----------|
| 6  | 0 | 3.761013  | 1.469348  | -1.088009 |
| 6  | 0 | 3.302008  | 0.466022  | -1.985186 |
| 6  | 0 | 1.888991  | 0.447895  | -1.939450 |
| 6  | 0 | 1.456256  | 1.441839  | -1.004273 |
| 6  | 0 | 2.632835  | 2.070333  | -0.484051 |
| 1  | 0 | 4.793704  | 1.715143  | -0.883769 |
| 1  | 0 | 3.925196  | -0.190724 | -2.576001 |
| 1  | 0 | 1.252603  | -0.241835 | -2.478557 |
| 1  | 0 | 2.666381  | 2.862252  | 0.251366  |
| 26 | 0 | 2.630728  | -0.000010 | 0.000013  |
| 6  | 0 | 3.760962  | -1.469412 | 1.088027  |
| 6  | 0 | 3.301968  | -0.466092 | 1.985216  |
| 6  | 0 | 2.632778  | -2.070360 | 0.484043  |
| 1  | 0 | 4.793650  | -1.715227 | 0.883798  |
| 6  | 0 | 1.888951  | -0.447933 | 1.939464  |
| 1  | 0 | 3.925163  | 0.190628  | 2.576053  |
| 6  | 0 | 1.456207  | -1.441848 | 1.004261  |
| 1  | 0 | 2.666314  | -2.862266 | -0.251389 |
| 1  | 0 | 1.252572  | 0.241802  | 2.478573  |
| 6  | 0 | 0.073859  | 1.687716  | -0.577497 |
| 6  | 0 | -0.195138 | 2.432247  | 0.585126  |
| 6  | 0 | -1.011005 | 1.169717  | -1.313599 |
| 6  | 0 | -1.497237 | 2.634483  | 1.010223  |
| 1  | 0 | 0.626436  | 2.845828  | 1.160443  |
| 6  | 0 | -2.309747 | 1.339193  | -0.873107 |
| 1  | 0 | -0.822806 | 0.629517  | -2.235427 |
| 6  | 0 | -2.567321 | 2.065130  | 0.302265  |
| 1  | 0 | -1.692475 | 3.213876  | 1.909513  |
| 1  | 0 | -3.139434 | 0.924309  | -1.439050 |
| 6  | 0 | 0.073807  | -1.687699 | 0.577476  |
| 6  | 0 | -0.195195 | -2.432175 | -0.585182 |
| 6  | 0 | -1.011054 | -1.169732 | 1.313604  |
| 6  | 0 | -1.497295 | -2.634392 | -1.010283 |
| 1  | 0 | 0.626378  | -2.845725 | -1.160524 |
| 6  | 0 | -2.309799 | -1.339198 | 0.873116  |
| 1  | 0 | -0.822849 | -0.629570 | 2.235454  |
| 6  | 0 | -2.567377 | -2.065085 | -0.302285 |
| 1  | 0 | -1.692537 | -3.213746 | -1.909597 |
| 1  | 0 | -3.139485 | -0.924348 | 1.439086  |
| 6  | 0 | -3.903710 | 2.195040  | 0.846575  |
| 8  | 0 | -4.883490 | 1.543852  | 0.475441  |
| 1  | 0 | -4.035995 | 2.915395  | 1.669947  |
| 6  | 0 | -3.903774 | -2.194999 | -0.846579 |
| 8  | 0 | -4.883568 | -1.543862 | -0.475389 |
| 1  | 0 | -4.036046 | -2.915291 | -1.670008 |
| 3  | 0 | -5.658375 | 0.000031  | -0.000016 |

**J) 4,4'-(Ferrocen-1,1'-diyl)dibenzaldehyde...Na<sup>+</sup> (8.9 Å) complex**

|    |   |           |           |           |
|----|---|-----------|-----------|-----------|
| 6  | 0 | -4.007950 | 1.485591  | 1.067142  |
| 6  | 0 | -3.553700 | 0.492692  | 1.977730  |
| 6  | 0 | -2.139907 | 0.469343  | 1.933626  |
| 6  | 0 | -1.702942 | 1.448501  | 0.986001  |
| 6  | 0 | -2.876157 | 2.074563  | 0.456812  |
| 1  | 0 | -5.039474 | 1.732499  | 0.858408  |
| 1  | 0 | -4.179724 | -0.154535 | 2.576000  |
| 1  | 0 | -1.505515 | -0.215852 | 2.480841  |
| 1  | 0 | -2.904458 | 2.857402  | -0.288576 |
| 26 | 0 | -2.882562 | -0.001577 | -0.000042 |
| 6  | 0 | -4.004286 | -1.488989 | -1.070208 |
| 6  | 0 | -3.550423 | -0.493936 | -1.978672 |
| 6  | 0 | -2.872339 | -2.077153 | -0.459301 |
| 1  | 0 | -5.035701 | -1.737713 | -0.863103 |
| 6  | 0 | -2.136694 | -0.468535 | -1.932814 |
| 1  | 0 | -4.176667 | 0.153486  | -2.576503 |
| 6  | 0 | -1.699460 | -1.448503 | -0.986154 |
| 1  | 0 | -2.900175 | -2.861501 | 0.284526  |
| 1  | 0 | -1.502591 | 0.218864  | -2.477630 |
| 6  | 0 | -0.318065 | 1.685011  | 0.556854  |
| 6  | 0 | -0.047646 | 2.386282  | -0.630851 |
| 6  | 0 | 0.765104  | 1.197699  | 1.314467  |
| 6  | 0 | 1.256536  | 2.581371  | -1.055762 |
| 1  | 0 | -0.869137 | 2.769168  | -1.227449 |
| 6  | 0 | 2.066771  | 1.366710  | 0.878899  |
| 1  | 0 | 0.574178  | 0.681733  | 2.249693  |
| 6  | 0 | 2.325470  | 2.055505  | -0.316570 |
| 1  | 0 | 1.452811  | 3.126722  | -1.976001 |
| 1  | 0 | 2.899103  | 0.973920  | 1.456146  |
| 6  | 0 | -0.314682 | -1.683996 | -0.556112 |
| 6  | 0 | -0.044592 | -2.382997 | 0.632985  |
| 6  | 0 | 0.768617  | -1.198324 | -1.314551 |
| 6  | 0 | 1.259531  | -2.577977 | 1.058150  |
| 1  | 0 | -0.866343 | -2.764065 | 1.230418  |
| 6  | 0 | 2.070236  | -1.366924 | -0.878581 |
| 1  | 0 | 0.577794  | -0.684125 | -2.250791 |
| 6  | 0 | 2.328667  | -2.053865 | 0.317997  |
| 1  | 0 | 1.455592  | -3.121778 | 1.979351  |
| 1  | 0 | 2.902691  | -0.975453 | -1.456551 |
| 6  | 0 | 3.673421  | 2.193105  | -0.844616 |
| 8  | 0 | 4.665492  | 1.622946  | -0.396237 |
| 1  | 0 | 3.785358  | 2.845512  | -1.728267 |
| 6  | 0 | 3.676633  | -2.191558 | 0.846177  |
| 8  | 0 | 4.669018  | -1.622457 | 0.397235  |
| 1  | 0 | 3.788229  | -2.843113 | 1.730499  |
| 11 | 0 | 6.025612  | 0.001292  | -0.002162 |

**K) 4,4'-(Ferrocen-1,1'-diyl)dibenzaldehyde...NH<sub>4</sub><sup>+</sup> (9.8 Å) complex**

|   |   |          |           |           |
|---|---|----------|-----------|-----------|
| 6 | 0 | 4.077000 | -1.706022 | 0.681201  |
| 6 | 0 | 3.702740 | -0.907994 | 1.796749  |
| 6 | 0 | 2.289791 | -0.836522 | 1.831750  |
| 6 | 0 | 1.773440 | -1.590127 | 0.730106  |
| 6 | 0 | 2.896620 | -2.125945 | 0.024020  |
| 1 | 0 | 5.087722 | -1.932733 | 0.372399  |
| 1 | 0 | 4.379235 | -0.412949 | 2.479259  |
| 1 | 0 | 1.708135 | -0.263478 | 2.541405  |
| 1 | 0 | 2.860309 | -2.739120 | -0.865651 |

|    |   |           |           |           |
|----|---|-----------|-----------|-----------|
| 26 | 0 | 2.966519  | -0.000013 | 0.000001  |
| 6  | 0 | 4.077042  | 1.705978  | -0.681181 |
| 6  | 0 | 3.702777  | 0.907962  | -1.796737 |
| 6  | 0 | 2.896664  | 2.125923  | -0.024012 |
| 1  | 0 | 5.087767  | 1.932666  | -0.372369 |
| 6  | 0 | 2.289827  | 0.836518  | -1.831753 |
| 1  | 0 | 4.379270  | 0.412910  | -2.479243 |
| 6  | 0 | 1.773480  | 1.590130  | -0.730112 |
| 1  | 0 | 2.860353  | 2.739086  | 0.865667  |
| 1  | 0 | 1.708168  | 0.263502  | -2.541427 |
| 6  | 0 | 0.360179  | -1.717025 | 0.350072  |
| 6  | 0 | -0.005510 | -2.188665 | -0.922327 |
| 6  | 0 | -0.658013 | -1.360186 | 1.256266  |
| 6  | 0 | -1.340831 | -2.295488 | -1.279733 |
| 1  | 0 | 0.764171  | -2.464152 | -1.635666 |
| 6  | 0 | -1.990101 | -1.452399 | 0.898543  |
| 1  | 0 | -0.392323 | -1.016393 | 2.250116  |
| 6  | 0 | -2.344280 | -1.919865 | -0.376549 |
| 1  | 0 | -1.611483 | -2.662135 | -2.267176 |
| 1  | 0 | -2.775104 | -1.173075 | 1.595072  |
| 6  | 0 | 0.360219  | 1.717038  | -0.350078 |
| 6  | 0 | -0.005470 | 2.188708  | 0.922309  |
| 6  | 0 | -0.657973 | 1.360175  | -1.256263 |
| 6  | 0 | -1.340791 | 2.295535  | 1.279714  |
| 1  | 0 | 0.764210  | 2.464217  | 1.635641  |
| 6  | 0 | -1.990060 | 1.452393  | -0.898541 |
| 1  | 0 | -0.392285 | 1.016358  | -2.250105 |
| 6  | 0 | -2.344239 | 1.919886  | 0.376542  |
| 1  | 0 | -1.611442 | 2.662205  | 2.267149  |
| 1  | 0 | -2.775063 | 1.173050  | -1.595062 |
| 6  | 0 | -3.736879 | -1.979752 | -0.792565 |
| 8  | 0 | -4.681200 | -1.609838 | -0.099122 |
| 1  | 0 | -3.925765 | -2.374682 | -1.807057 |
| 6  | 0 | -3.736838 | 1.979776  | 0.792558  |
| 8  | 0 | -4.681155 | 1.609821  | 0.099131  |
| 1  | 0 | -3.925726 | 2.374744  | 1.807035  |
| 1  | 0 | -6.159263 | 0.812368  | 0.167802  |
| 7  | 0 | -6.802124 | 0.000023  | 0.000003  |
| 1  | 0 | -7.390080 | -0.176487 | 0.814126  |
| 1  | 0 | -7.390082 | 0.176534  | -0.814118 |
| 1  | 0 | -6.159265 | -0.812325 | -0.167797 |

**L) 4,4'-(Ferrocen-1,1'-diyl)dibenzaldehyde PCM (CH<sub>2</sub>Cl<sub>2</sub>)**

|    |   |          |           |           |
|----|---|----------|-----------|-----------|
| 6  | 0 | 3.679139 | 1.691993  | 0.790325  |
| 6  | 0 | 3.613043 | 1.798125  | -0.626411 |
| 6  | 0 | 2.245127 | 1.841675  | -1.000029 |
| 6  | 0 | 1.454007 | 1.760792  | 0.185686  |
| 6  | 0 | 2.353138 | 1.663184  | 1.291511  |
| 1  | 0 | 4.581667 | 1.613179  | 1.380765  |
| 1  | 0 | 4.456378 | 1.801084  | -1.303163 |
| 1  | 0 | 1.864737 | 1.874029  | -2.012639 |
| 1  | 0 | 2.069431 | 1.577865  | 2.332040  |
| 26 | 0 | 2.655518 | -0.000004 | -0.000001 |
| 6  | 0 | 3.679120 | -1.692011 | -0.790331 |
| 6  | 0 | 3.613030 | -1.798141 | 0.626406  |
| 6  | 0 | 2.353116 | -1.663194 | -1.291511 |
| 1  | 0 | 4.581646 | -1.613205 | -1.380775 |
| 6  | 0 | 2.245115 | -1.841674 | 1.000030  |
| 1  | 0 | 4.456368 | -1.801108 | 1.303153  |

|   |   |           |           |           |
|---|---|-----------|-----------|-----------|
| 6 | 0 | 1.453991  | -1.760791 | -0.185681 |
| 1 | 0 | 2.069405  | -1.577875 | -2.332039 |
| 1 | 0 | 1.864727  | -1.874021 | 2.012642  |
| 6 | 0 | -0.017410 | 1.760661  | 0.253706  |
| 6 | 0 | -0.685196 | 1.124695  | 1.310461  |
| 6 | 0 | -0.773810 | 2.393089  | -0.747414 |
| 6 | 0 | -2.072534 | 1.113558  | 1.360107  |
| 1 | 0 | -0.112001 | 0.604693  | 2.073031  |
| 6 | 0 | -2.160369 | 2.374146  | -0.705008 |
| 1 | 0 | -0.264735 | 2.904866  | -1.558510 |
| 6 | 0 | -2.817501 | 1.731501  | 0.350575  |
| 1 | 0 | -2.585505 | 0.601216  | 2.171100  |
| 1 | 0 | -2.748623 | 2.853841  | -1.481695 |
| 6 | 0 | -0.017427 | -1.760648 | -0.253697 |
| 6 | 0 | -0.685212 | -1.124774 | -1.310509 |
| 6 | 0 | -0.773829 | -2.392997 | 0.747471  |
| 6 | 0 | -2.072549 | -1.113650 | -1.360164 |
| 1 | 0 | -0.112015 | -0.604850 | -2.073132 |
| 6 | 0 | -2.160388 | -2.374044 | 0.705070  |
| 1 | 0 | -0.264753 | -2.904708 | 1.558608  |
| 6 | 0 | -2.817517 | -1.731494 | -0.350572 |
| 1 | 0 | -2.585521 | -0.601390 | -2.171209 |
| 1 | 0 | -2.748643 | -2.853672 | 1.481798  |
| 6 | 0 | -4.289922 | 1.667107  | 0.401777  |
| 8 | 0 | -5.029788 | 2.127123  | -0.448327 |
| 1 | 0 | -4.710308 | 1.147612  | 1.285244  |
| 6 | 0 | -4.289937 | -1.667101 | -0.401782 |
| 8 | 0 | -5.029807 | -2.127091 | 0.448334  |
| 1 | 0 | -4.710323 | -1.147737 | -1.285326 |

**M) 4,4'-(Ferrocen-1,1'-diyl)dibenzaldehyde PCM (EtOH)**

|    |   |           |           |           |
|----|---|-----------|-----------|-----------|
| 6  | 0 | -3.679439 | 1.694696  | -0.784493 |
| 6  | 0 | -3.612868 | 1.796224  | 0.632757  |
| 6  | 0 | -2.244830 | 1.838136  | 1.006393  |
| 6  | 0 | -1.454136 | 1.760627  | -0.180007 |
| 6  | 0 | -2.353594 | 1.666934  | -1.286219 |
| 1  | 0 | -4.582164 | 1.617450  | -1.374895 |
| 1  | 0 | -4.456024 | 1.796554  | 1.309788  |
| 1  | 0 | -1.864257 | 1.866315  | 2.019078  |
| 1  | 0 | -2.070278 | 1.583728  | -2.327048 |
| 26 | 0 | -2.655768 | -0.000097 | 0.000029  |
| 6  | 0 | -3.679200 | -1.695012 | 0.784598  |
| 6  | 0 | -3.612685 | -1.796530 | -0.632656 |
| 6  | 0 | -2.353335 | -1.667093 | 1.286262  |
| 1  | 0 | -4.581908 | -1.617874 | 1.375042  |
| 6  | 0 | -2.244659 | -1.838279 | -1.006356 |
| 1  | 0 | -4.455872 | -1.796960 | -1.309648 |
| 6  | 0 | -1.453918 | -1.760678 | 0.180007  |
| 1  | 0 | -2.069981 | -1.583854 | 2.327077  |
| 1  | 0 | -1.864130 | -1.866411 | -2.019059 |
| 6  | 0 | 0.017148  | 1.759056  | -0.249325 |
| 6  | 0 | 0.682419  | 1.128552  | -1.311090 |
| 6  | 0 | 0.775857  | 2.384358  | 0.754798  |
| 6  | 0 | 2.069584  | 1.116657  | -1.363322 |
| 1  | 0 | 0.107786  | 0.613694  | -2.076047 |
| 6  | 0 | 2.162282  | 2.365022  | 0.709423  |
| 1  | 0 | 0.269006  | 2.889953  | 1.571095  |
| 6  | 0 | 2.817026  | 1.728805  | -0.351796 |
| 1  | 0 | 2.580383  | 0.608959  | -2.178526 |

|   |   |          |           |           |
|---|---|----------|-----------|-----------|
| 1 | 0 | 2.751391 | 2.839233  | 1.488822  |
| 6 | 0 | 0.017368 | -1.758930 | 0.249255  |
| 6 | 0 | 0.682614 | -1.128351 | 1.310991  |
| 6 | 0 | 0.776104 | -2.384134 | -0.754908 |
| 6 | 0 | 2.069780 | -1.116291 | 1.363158  |
| 1 | 0 | 0.107956 | -0.613565 | 2.075978  |
| 6 | 0 | 2.162528 | -2.364629 | -0.709601 |
| 1 | 0 | 0.269274 | -2.889784 | -1.571186 |
| 6 | 0 | 2.817247 | -1.728327 | 0.351582  |
| 1 | 0 | 2.580557 | -0.608532 | 2.178338  |
| 1 | 0 | 2.751657 | -2.838754 | -1.489038 |
| 6 | 0 | 4.288411 | 1.664646  | -0.409423 |
| 8 | 0 | 5.033457 | 2.122301  | 0.438459  |
| 1 | 0 | 4.704449 | 1.146620  | -1.295558 |
| 6 | 0 | 4.288626 | -1.663925 | 0.409098  |
| 8 | 0 | 5.033725 | -2.123053 | -0.437939 |
| 1 | 0 | 4.704692 | -1.147435 | 1.296116  |

**N) 4,4'-(Ferrocen-1,1'-diyl)dibenzaldehyde...Na<sup>+</sup> complex PCM (CH<sub>2</sub>Cl<sub>2</sub>)**

|    |   |           |           |           |
|----|---|-----------|-----------|-----------|
| 6  | 0 | -4.058995 | 1.750801  | 0.565816  |
| 6  | 0 | -3.719387 | 1.006569  | 1.728946  |
| 6  | 0 | -2.306803 | 0.919577  | 1.798197  |
| 6  | 0 | -1.757188 | 1.611269  | 0.672907  |
| 6  | 0 | -2.857184 | 2.123257  | -0.084649 |
| 1  | 0 | -5.059680 | 1.966724  | 0.217822  |
| 1  | 0 | -4.416430 | 0.551727  | 2.419285  |
| 1  | 0 | -1.749143 | 0.374032  | 2.547859  |
| 1  | 0 | -2.792691 | 2.679352  | -1.009838 |
| 26 | 0 | -2.962856 | 0.002033  | 0.000118  |
| 6  | 0 | -4.065901 | -1.742869 | -0.564467 |
| 6  | 0 | -3.724692 | -1.000003 | -1.727991 |
| 6  | 0 | -2.864858 | -2.119632 | 0.084925  |
| 1  | 0 | -5.067039 | -1.955120 | -0.215527 |
| 6  | 0 | -2.311892 | -0.918091 | -1.798554 |
| 1  | 0 | -4.420729 | -0.542780 | -2.417772 |
| 6  | 0 | -1.763735 | -1.611558 | -0.673610 |
| 1  | 0 | -2.801620 | -2.675818 | 1.010138  |
| 1  | 0 | -1.753074 | -0.374656 | -2.548875 |
| 6  | 0 | -0.330785 | 1.713095  | 0.320848  |
| 6  | 0 | 0.064830  | 2.177177  | -0.943458 |
| 6  | 0 | 0.662262  | 1.346509  | 1.248401  |
| 6  | 0 | 1.410298  | 2.272102  | -1.271844 |
| 1  | 0 | -0.684652 | 2.455691  | -1.677122 |
| 6  | 0 | 2.004320  | 1.424379  | 0.917605  |
| 1  | 0 | 0.374620  | 0.996793  | 2.234303  |
| 6  | 0 | 2.388448  | 1.888758  | -0.347845 |
| 1  | 0 | 1.706901  | 2.629415  | -2.254944 |
| 1  | 0 | 2.770163  | 1.126597  | 1.628384  |
| 6  | 0 | -0.337498 | -1.716382 | -0.321795 |
| 6  | 0 | 0.057477  | -2.182510 | 0.941948  |
| 6  | 0 | 0.656004  | -1.349149 | -1.248602 |
| 6  | 0 | 1.402810  | -2.277914 | 1.270878  |
| 1  | 0 | -0.692319 | -2.461745 | 1.675006  |
| 6  | 0 | 1.997837  | -1.427569 | -0.917294 |
| 1  | 0 | 0.368890  | -0.997972 | -2.234133 |
| 6  | 0 | 2.381326  | -1.893071 | 0.347931  |
| 1  | 0 | 1.698932  | -2.636240 | 2.253754  |
| 1  | 0 | 2.764006  | -1.128677 | -1.627226 |
| 6  | 0 | 3.797330  | 1.926123  | -0.743866 |



|    |   |          |           |           |
|----|---|----------|-----------|-----------|
| 8  | 0 | 4.720332 | 1.524727  | -0.048156 |
| 1  | 0 | 4.003938 | 2.334349  | -1.749526 |
| 6  | 0 | 3.789889 | -1.927767 | 0.745141  |
| 8  | 0 | 4.711904 | -1.521284 | 0.051102  |
| 1  | 0 | 3.997097 | -2.337880 | 1.749883  |
| 11 | 0 | 6.385977 | -0.003892 | -0.002319 |

**O) 4,4'-(Ferrocen-1,1'-diyl)dibenzaldehyde...Na<sup>+</sup> complex PCM (EtOH)**

|    |   |           |           |           |
|----|---|-----------|-----------|-----------|
| 6  | 0 | -4.062823 | 1.753711  | 0.550724  |
| 6  | 0 | -3.725559 | 1.017569  | 1.719847  |
| 6  | 0 | -2.312797 | 0.931232  | 1.792612  |
| 6  | 0 | -1.760944 | 1.615203  | 0.663733  |
| 6  | 0 | -2.859282 | 2.121704  | -0.099851 |
| 1  | 0 | -5.062793 | 1.966304  | 0.198508  |
| 1  | 0 | -4.423865 | 0.566698  | 2.411599  |
| 1  | 0 | -1.756586 | 0.389877  | 2.546449  |
| 1  | 0 | -2.792342 | 2.669839  | -1.029659 |
| 26 | 0 | -2.966301 | 0.001244  | -0.000155 |
| 6  | 0 | -4.066987 | -1.748682 | -0.551303 |
| 6  | 0 | -3.728188 | -1.013048 | -1.720289 |
| 6  | 0 | -2.864229 | -2.119597 | 0.099042  |
| 1  | 0 | -5.067396 | -1.959059 | -0.199003 |
| 6  | 0 | -2.315263 | -0.929865 | -1.793188 |
| 1  | 0 | -4.425555 | -0.560444 | -2.411858 |
| 6  | 0 | -1.764823 | -1.615302 | -0.664473 |
| 1  | 0 | -2.798551 | -2.668100 | 1.028717  |
| 1  | 0 | -1.758033 | -0.389714 | -2.547126 |
| 6  | 0 | -0.333301 | 1.714521  | 0.313909  |
| 6  | 0 | 0.065089  | 2.164311  | -0.954539 |
| 6  | 0 | 0.657257  | 1.357466  | 1.247547  |
| 6  | 0 | 1.411607  | 2.252238  | -1.282139 |
| 1  | 0 | -0.682611 | 2.434281  | -1.693269 |
| 6  | 0 | 2.000254  | 1.429926  | 0.918106  |
| 1  | 0 | 0.367726  | 1.017381  | 2.236319  |
| 6  | 0 | 2.387203  | 1.878130  | -0.352087 |
| 1  | 0 | 1.710407  | 2.595243  | -2.269618 |
| 1  | 0 | 2.764120  | 1.137088  | 1.633111  |
| 6  | 0 | -0.337460 | -1.716581 | -0.314141 |
| 6  | 0 | 0.059950  | -2.169743 | 0.953409  |
| 6  | 0 | 0.653801  | -1.357092 | -1.246100 |
| 6  | 0 | 1.406216  | -2.258132 | 1.281956  |
| 1  | 0 | -0.688233 | -2.441910 | 1.690829  |
| 6  | 0 | 1.996483  | -1.429928 | -0.915659 |
| 1  | 0 | 0.365081  | -1.014490 | -2.234234 |
| 6  | 0 | 2.382441  | -1.880940 | 0.353836  |
| 1  | 0 | 1.704298  | -2.603566 | 2.268805  |
| 1  | 0 | 2.760838  | -1.134848 | -1.629206 |
| 6  | 0 | 3.798600  | 1.903876  | -0.746070 |
| 8  | 0 | 4.717112  | 1.518172  | -0.036957 |
| 1  | 0 | 4.008542  | 2.286467  | -1.760986 |
| 6  | 0 | 3.793372  | -1.905658 | 0.749301  |
| 8  | 0 | 4.711571  | -1.513758 | 0.043235  |
| 1  | 0 | 4.003295  | -2.293125 | 1.762335  |
| 11 | 0 | 6.416575  | -0.003408 | -0.006637 |

**P) Ferrocene**

|    |   |           |           |           |
|----|---|-----------|-----------|-----------|
| 6  | 0 | -1.759608 | 1.188518  | -0.212051 |
| 6  | 0 | -1.754035 | 0.165173  | -1.197514 |
| 6  | 0 | -1.751303 | -1.088409 | -0.529186 |
| 6  | 0 | -1.754258 | -0.840283 | 0.869692  |
| 6  | 0 | -1.759143 | 0.567343  | 1.065838  |
| 1  | 0 | -1.730867 | 2.252789  | -0.400628 |
| 1  | 0 | -1.718783 | 0.314946  | -2.267856 |
| 1  | 0 | -1.715244 | -2.060090 | -1.002078 |
| 1  | 0 | -1.731567 | 1.076879  | 2.019050  |
| 26 | 0 | 0.000137  | 0.002279  | 0.001361  |
| 6  | 0 | 1.753122  | -0.493800 | -1.103574 |
| 6  | 0 | 1.755188  | 0.896532  | -0.810865 |
| 6  | 0 | 1.754435  | -1.201944 | 0.128066  |
| 6  | 0 | 1.757756  | 1.047681  | 0.602120  |
| 1  | 0 | 1.723871  | 1.698675  | -1.535228 |
| 6  | 0 | 1.757525  | -0.249489 | 1.182206  |
| 1  | 0 | 1.723284  | -2.276517 | 0.243909  |
| 1  | 0 | 1.727839  | 1.984368  | 1.141199  |
| 1  | 0 | 1.723858  | -0.472488 | 2.239718  |
| 1  | 0 | 1.720166  | -0.935665 | -2.089893 |
| 1  | 0 | -1.724207 | -1.590089 | 1.648029  |

**Q) 1-Phenylferrocene**

|    |   |           |           |           |
|----|---|-----------|-----------|-----------|
| 6  | 0 | -1.711290 | -1.846326 | -0.740644 |
| 6  | 0 | -1.008432 | -1.928485 | 0.491663  |
| 6  | 0 | -1.812651 | -1.325026 | 1.495426  |
| 6  | 0 | -3.011460 | -0.868156 | 0.883766  |
| 6  | 0 | -2.948975 | -1.189932 | -0.498753 |
| 1  | 0 | -1.352831 | -2.191313 | -1.701035 |
| 1  | 0 | -0.014217 | -2.332041 | 0.630721  |
| 1  | 0 | -1.541774 | -1.199390 | 2.534556  |
| 1  | 0 | -3.696498 | -0.948715 | -1.241869 |
| 26 | 0 | -1.338684 | 0.111802  | 0.000550  |
| 6  | 0 | 0.533234  | 1.102428  | -0.232147 |
| 6  | 0 | -0.244819 | 1.255606  | -1.417549 |
| 6  | 0 | -0.196422 | 1.705297  | 0.834301  |
| 6  | 0 | -1.439917 | 1.944216  | -1.082286 |
| 1  | 0 | 0.030552  | 0.896398  | -2.400170 |
| 6  | 0 | -1.410981 | 2.220972  | 0.310964  |
| 1  | 0 | 0.102166  | 1.710179  | 1.874399  |
| 1  | 0 | -2.243485 | 2.188921  | -1.762865 |
| 1  | 0 | -2.193973 | 2.703663  | 0.879238  |
| 6  | 0 | 1.840280  | 0.423935  | -0.122133 |
| 6  | 0 | 2.159256  | -0.670233 | -0.937533 |
| 6  | 0 | 2.793980  | 0.873133  | 0.798331  |
| 6  | 0 | 3.397813  | -1.296558 | -0.834820 |
| 1  | 0 | 1.418459  | -1.042011 | -1.641472 |
| 6  | 0 | 4.030878  | 0.241409  | 0.908049  |
| 1  | 0 | 2.567361  | 1.735270  | 1.419104  |
| 6  | 0 | 4.338656  | -0.844850 | 0.091456  |
| 1  | 0 | 3.627073  | -2.145391 | -1.472016 |
| 1  | 0 | 4.758708  | 0.605678  | 1.626666  |
| 1  | 0 | 5.303141  | -1.335730 | 0.174898  |
| 1  | 0 | -3.813784 | -0.336955 | 1.376994  |

**R) 1-([1,1'-Biphenyl]-4-yl)ferrocene**

|    |   |           |           |           |
|----|---|-----------|-----------|-----------|
| 6  | 0 | -2.870294 | -2.066768 | -0.800315 |
| 6  | 0 | -2.150395 | -2.018099 | 0.424105  |
| 6  | 0 | -3.064997 | -1.678807 | 1.456886  |
| 6  | 0 | -4.349894 | -1.515867 | 0.871101  |
| 6  | 0 | -4.229839 | -1.755519 | -0.524239 |
| 1  | 0 | -2.450088 | -2.267576 | -1.776603 |
| 1  | 0 | -1.084249 | -2.160980 | 0.541261  |
| 1  | 0 | -2.818282 | -1.531054 | 2.499130  |
| 1  | 0 | -5.024528 | -1.677489 | -1.253108 |
| 26 | 0 | -2.992990 | -0.110016 | 0.021293  |
| 6  | 0 | -1.433519 | 1.322912  | -0.200084 |
| 6  | 0 | -2.261355 | 1.325433  | -1.362116 |
| 6  | 0 | -2.258409 | 1.681390  | 0.906901  |
| 6  | 0 | -3.578691 | 1.681397  | -0.973081 |
| 1  | 0 | -1.936766 | 1.085890  | -2.365812 |
| 6  | 0 | -3.577755 | 1.900000  | 0.430583  |
| 1  | 0 | -1.941912 | 1.718258  | 1.940946  |
| 1  | 0 | -4.437725 | 1.743827  | -1.626464 |
| 1  | 0 | -4.437970 | 2.150327  | 1.035806  |
| 6  | 0 | -0.000016 | 0.977407  | -0.150360 |
| 6  | 0 | 0.556797  | 0.069530  | -1.061241 |
| 6  | 0 | 0.844176  | 1.554501  | 0.804234  |
| 6  | 0 | 1.909310  | -0.246156 | -1.020314 |
| 1  | 0 | -0.087566 | -0.416103 | -1.789973 |
| 6  | 0 | 2.196532  | 1.231130  | 0.851141  |
| 1  | 0 | 0.441580  | 2.283996  | 1.501101  |
| 6  | 0 | 2.754420  | 0.326831  | -0.060399 |
| 1  | 0 | 2.311150  | -0.973881 | -1.719931 |
| 1  | 0 | 2.837021  | 1.713404  | 1.584440  |
| 6  | 0 | 4.197466  | -0.014260 | -0.008512 |
| 6  | 0 | 4.942232  | -0.171872 | -1.184399 |
| 6  | 0 | 4.846837  | -0.184280 | 1.221067  |
| 6  | 0 | 6.297153  | -0.489352 | -1.132041 |
| 1  | 0 | 4.460460  | -0.018557 | -2.146069 |
| 6  | 0 | 6.202032  | -0.499084 | 1.274707  |
| 1  | 0 | 4.277427  | -0.092233 | 2.141818  |
| 6  | 0 | 6.932907  | -0.653560 | 0.097695  |
| 1  | 0 | 6.859340  | -0.598712 | -2.054479 |
| 1  | 0 | 6.685184  | -0.633851 | 2.237611  |
| 1  | 0 | 7.989175  | -0.900236 | 0.137976  |
| 1  | 0 | -5.252690 | -1.226079 | 1.390801  |

**S) 1-(4-Methoxyphenyl)ferrocene**

|    |   |           |           |           |
|----|---|-----------|-----------|-----------|
| 6  | 0 | -2.343208 | 1.875627  | -0.979869 |
| 6  | 0 | -2.275999 | 2.114743  | 0.418368  |
| 6  | 0 | -0.991016 | 1.712275  | 0.869982  |
| 6  | 0 | -0.254023 | 1.221333  | -0.247108 |
| 6  | 0 | -1.100528 | 1.324646  | -1.390103 |
| 1  | 0 | -3.199627 | 2.053293  | -1.615537 |
| 1  | 0 | -3.075973 | 2.495455  | 1.038042  |
| 1  | 0 | -0.645515 | 1.718703  | 1.895457  |
| 1  | 0 | -0.836595 | 1.024773  | -2.395521 |
| 26 | 0 | -2.006146 | 0.035156  | 0.037064  |
| 6  | 0 | -3.563695 | -1.130591 | 0.905977  |
| 6  | 0 | -3.461530 | -1.433303 | -0.478608 |
| 6  | 0 | -2.324304 | -1.457329 | 1.519402  |
| 6  | 0 | -2.158501 | -1.948001 | -0.719659 |

|   |   |           |           |           |
|---|---|-----------|-----------|-----------|
| 1 | 0 | -4.227933 | -1.270040 | -1.223554 |
| 6 | 0 | -1.454873 | -1.961248 | 0.514750  |
| 1 | 0 | -2.072283 | -1.309500 | 2.560398  |
| 1 | 0 | -1.762482 | -2.246865 | -1.680672 |
| 6 | 0 | 1.120966  | 0.684582  | -0.222268 |
| 6 | 0 | 1.507579  | -0.366359 | -1.069818 |
| 6 | 0 | 2.081576  | 1.216371  | 0.636739  |
| 6 | 0 | 2.800728  | -0.861102 | -1.056674 |
| 1 | 0 | 0.771960  | -0.809648 | -1.736603 |
| 6 | 0 | 3.389100  | 0.725251  | 0.668974  |
| 1 | 0 | 1.813869  | 2.045739  | 1.285384  |
| 6 | 0 | 3.751775  | -0.317409 | -0.183507 |
| 1 | 0 | 3.102434  | -1.676014 | -1.706425 |
| 1 | 0 | 4.105596  | 1.168619  | 1.350272  |
| 8 | 0 | 4.993335  | -0.870868 | -0.240468 |
| 6 | 0 | 5.991668  | -0.330416 | 0.598536  |
| 1 | 0 | 5.726093  | -0.444002 | 1.656709  |
| 1 | 0 | 6.899620  | -0.895462 | 0.390082  |
| 1 | 0 | 6.163049  | 0.730204  | 0.377881  |
| 1 | 0 | -0.422699 | -2.254161 | 0.654868  |
| 1 | 0 | -4.420691 | -0.692635 | 1.398642  |

**T) 4-(Ferrocen-1-yl)benzaldehyde**

|    |   |           |           |           |
|----|---|-----------|-----------|-----------|
| 6  | 0 | 2.286416  | 1.862245  | 0.985792  |
| 6  | 0 | 2.229201  | 2.100159  | -0.413845 |
| 6  | 0 | 0.942629  | 1.717683  | -0.871968 |
| 6  | 0 | 0.195369  | 1.234008  | 0.242626  |
| 6  | 0 | 1.037790  | 1.326515  | 1.391347  |
| 1  | 0 | 3.141416  | 2.031824  | 1.625392  |
| 1  | 0 | 3.037398  | 2.469377  | -1.029670 |
| 1  | 0 | 0.603936  | 1.730055  | -1.899475 |
| 1  | 0 | 0.766146  | 1.034590  | 2.396804  |
| 26 | 0 | 1.925273  | 0.020484  | -0.031877 |
| 6  | 0 | 3.450775  | -1.162990 | -0.926803 |
| 6  | 0 | 3.381787  | -1.450066 | 0.463112  |
| 6  | 0 | 2.193869  | -1.487509 | -1.505120 |
| 1  | 0 | 4.297874  | -0.736209 | -1.445686 |
| 6  | 0 | 2.081575  | -1.952501 | 0.743011  |
| 1  | 0 | 4.167486  | -1.283248 | 1.186835  |
| 6  | 0 | 1.347192  | -1.974424 | -0.473376 |
| 1  | 0 | 1.916493  | -1.350244 | -2.541080 |
| 1  | 0 | 1.708335  | -2.238281 | 1.716953  |
| 6  | 0 | -1.180980 | 0.707353  | 0.211238  |
| 6  | 0 | -1.590839 | -0.287367 | 1.110040  |
| 6  | 0 | -2.108931 | 1.204219  | -0.718639 |
| 6  | 0 | -2.893190 | -0.770390 | 1.080022  |
| 1  | 0 | -0.874142 | -0.693635 | 1.818586  |
| 6  | 0 | -3.407359 | 0.716734  | -0.755696 |
| 1  | 0 | -1.804886 | 1.991855  | -1.401568 |
| 6  | 0 | -3.806941 | -0.274332 | 0.146298  |
| 1  | 0 | -3.204961 | -1.544425 | 1.778113  |
| 1  | 0 | -4.132826 | 1.096407  | -1.469001 |
| 6  | 0 | -5.190047 | -0.800783 | 0.121811  |
| 8  | 0 | -6.048857 | -0.430482 | -0.647264 |
| 1  | 0 | -5.408836 | -1.584808 | 0.876608  |
| 1  | 0 | 0.310429  | -2.263313 | -0.584984 |

**U) 1,1'-Diphenylferrocene (unfolded)**

|    |   |           |           |           |
|----|---|-----------|-----------|-----------|
| 6  | 0 | 0.036225  | 2.084292  | -1.269173 |
| 6  | 0 | -0.332782 | 2.086954  | 0.103074  |
| 6  | 0 | 0.739928  | 1.525727  | 0.844490  |
| 6  | 0 | 1.778455  | 1.167252  | -0.064730 |
| 6  | 0 | 1.333790  | 1.517372  | -1.374186 |
| 1  | 0 | -0.574779 | 2.424612  | -2.094003 |
| 1  | 0 | -1.284236 | 2.407564  | 0.506029  |
| 1  | 0 | 0.745495  | 1.338727  | 1.910203  |
| 1  | 0 | 1.890413  | 1.366224  | -2.289263 |
| 26 | 0 | 0.006426  | 0.085386  | -0.539519 |
| 6  | 0 | -1.760726 | -1.088955 | -0.314851 |
| 6  | 0 | -1.309449 | -1.146880 | -1.666646 |
| 6  | 0 | -0.720557 | -1.621902 | 0.502041  |
| 6  | 0 | -0.006164 | -1.710858 | -1.678446 |
| 1  | 0 | -1.868679 | -0.812648 | -2.530363 |
| 6  | 0 | 0.359356  | -2.002171 | -0.336717 |
| 1  | 0 | -0.731659 | -1.666413 | 1.583122  |
| 1  | 0 | 0.609743  | -1.865713 | -2.553872 |
| 6  | 0 | 3.057127  | 0.512530  | 0.278609  |
| 6  | 0 | 3.666196  | -0.381099 | -0.612723 |
| 6  | 0 | 3.688581  | 0.773069  | 1.500083  |
| 6  | 0 | 4.870634  | -0.998393 | -0.291272 |
| 1  | 0 | 3.174839  | -0.607711 | -1.555780 |
| 6  | 0 | 4.890899  | 0.148704  | 1.826714  |
| 1  | 0 | 3.240175  | 1.481345  | 2.191071  |
| 6  | 0 | 5.487430  | -0.738468 | 0.933046  |
| 1  | 0 | 5.324358  | -1.691643 | -0.993086 |
| 1  | 0 | 5.366287  | 0.362377  | 2.779251  |
| 1  | 0 | 6.424382  | -1.223914 | 1.187066  |
| 1  | 0 | 1.314424  | -2.388393 | -0.005831 |
| 6  | 0 | -3.056724 | -0.560877 | 0.155390  |
| 6  | 0 | -3.691909 | 0.498168  | -0.506890 |
| 6  | 0 | -3.683522 | -1.124384 | 1.272427  |
| 6  | 0 | -4.921124 | 0.978270  | -0.064224 |
| 1  | 0 | -3.204685 | 0.957629  | -1.363636 |
| 6  | 0 | -4.909723 | -0.638722 | 1.721598  |
| 1  | 0 | -3.212258 | -1.960928 | 1.780443  |
| 6  | 0 | -5.534183 | 0.413355  | 1.054599  |
| 1  | 0 | -5.398638 | 1.800797  | -0.588093 |
| 1  | 0 | -5.381910 | -1.089975 | 2.588874  |
| 1  | 0 | -6.490895 | 0.790108  | 1.402074  |

**V) 1,1'-Bis([1,1'-diphenyl]-4-yl)ferrocene (unfolded)**

|    |   |           |           |           |
|----|---|-----------|-----------|-----------|
| 6  | 0 | -0.276260 | -2.679377 | -1.054009 |
| 6  | 0 | -0.689434 | -1.438814 | -1.609690 |
| 6  | 0 | 0.434569  | -0.572865 | -1.630219 |
| 6  | 0 | 1.553263  | -1.272219 | -1.086110 |
| 6  | 0 | 1.103688  | -2.578721 | -0.733414 |
| 1  | 0 | -0.909660 | -3.535846 | -0.867541 |
| 1  | 0 | -1.693523 | -1.180855 | -1.919134 |
| 1  | 0 | 0.443026  | 0.449041  | -1.984768 |
| 1  | 0 | 1.699805  | -3.339276 | -0.246703 |
| 26 | 0 | 0.008622  | -1.126667 | 0.373969  |
| 6  | 0 | -1.531597 | -0.284540 | 1.583100  |
| 6  | 0 | -1.082271 | -1.510991 | 2.156759  |
| 6  | 0 | -0.412391 | 0.599277  | 1.545309  |
| 6  | 0 | 0.296653  | -1.380794 | 2.467706  |

|   |   |            |           |           |
|---|---|------------|-----------|-----------|
| 1 | 0 | -1.692013  | -2.390104 | 2.317487  |
| 6 | 0 | 0.711946   | -0.076782 | 2.087576  |
| 1 | 0 | -0.412489  | 1.594298  | 1.119343  |
| 1 | 0 | 0.928900   | -2.150392 | 2.888161  |
| 6 | 0 | 2.910710   | -0.728308 | -0.887392 |
| 6 | 0 | 4.034456   | -1.558898 | -0.954529 |
| 6 | 0 | 3.110974   | 0.634538  | -0.630984 |
| 6 | 0 | 5.314098   | -1.047642 | -0.759490 |
| 1 | 0 | 3.904199   | -2.616124 | -1.167564 |
| 6 | 0 | 4.388900   | 1.146132  | -0.443161 |
| 1 | 0 | 2.250998   | 1.296758  | -0.566226 |
| 6 | 0 | 5.514233   | 0.312636  | -0.498563 |
| 1 | 0 | 6.169597   | -1.716714 | -0.791282 |
| 1 | 0 | 4.521012   | 2.209807  | -0.264865 |
| 1 | 0 | 1.719678   | 0.311872  | 2.149549  |
| 6 | 0 | -2.893125  | 0.003550  | 1.092622  |
| 6 | 0 | -3.699323  | -1.010719 | 0.559569  |
| 6 | 0 | -3.418715  | 1.298506  | 1.158669  |
| 6 | 0 | -4.987190  | -0.739683 | 0.114577  |
| 1 | 0 | -3.297043  | -2.016668 | 0.467234  |
| 6 | 0 | -4.705213  | 1.571480  | 0.704729  |
| 1 | 0 | -2.822313  | 2.093860  | 1.596778  |
| 6 | 0 | -5.513772  | 0.557685  | 0.178461  |
| 1 | 0 | -5.584321  | -1.537134 | -0.319281 |
| 1 | 0 | -5.102984  | 2.578590  | 0.794268  |
| 6 | 0 | 6.877160   | 0.857456  | -0.280658 |
| 6 | 0 | 7.955092   | 0.433585  | -1.068334 |
| 6 | 0 | 7.113597   | 1.806935  | 0.722009  |
| 6 | 0 | 9.233554   | 0.944500  | -0.859195 |
| 1 | 0 | 7.783165   | -0.284343 | -1.865474 |
| 6 | 0 | 8.391393   | 2.318818  | 0.931549  |
| 1 | 0 | 6.291966   | 2.126487  | 1.357131  |
| 6 | 0 | 9.456623   | 1.889280  | 0.141570  |
| 1 | 0 | 10.055697  | 0.611237  | -1.485167 |
| 1 | 0 | 8.556486   | 3.048459  | 1.718349  |
| 1 | 0 | 10.452858  | 2.288568  | 0.303603  |
| 6 | 0 | -6.891693  | 0.846500  | -0.290332 |
| 6 | 0 | -7.938957  | -0.043790 | -0.020099 |
| 6 | 0 | -7.176188  | 2.016369  | -1.006305 |
| 6 | 0 | -9.234082  | 0.227432  | -0.453287 |
| 1 | 0 | -7.738472  | -0.942491 | 0.556612  |
| 6 | 0 | -8.471333  | 2.289360  | -1.438629 |
| 1 | 0 | -6.370026  | 2.704871  | -1.244272 |
| 6 | 0 | -9.505468  | 1.395684  | -1.163711 |
| 1 | 0 | -10.034698 | -0.470286 | -0.227427 |
| 1 | 0 | -8.672194  | 3.197881  | -1.998135 |
| 1 | 0 | -10.515217 | 1.608367  | -1.500441 |

**W) 1,1'-Bis(4-methoxyphenyl)ferrocene (unfolded)**

|    |   |           |           |           |
|----|---|-----------|-----------|-----------|
| 6  | 0 | -0.226660 | -0.767438 | 2.351736  |
| 6  | 0 | -0.540230 | -1.543515 | 1.203869  |
| 6  | 0 | 0.612585  | -1.582587 | 0.375351  |
| 6  | 0 | 1.646574  | -0.828593 | 1.004077  |
| 6  | 0 | 1.117635  | -0.325271 | 2.229321  |
| 1  | 0 | -0.901266 | -0.527465 | 3.162433  |
| 1  | 0 | -1.503760 | -1.978708 | 0.973563  |
| 1  | 0 | 0.681426  | -2.050008 | -0.598246 |
| 1  | 0 | 1.653220  | 0.293749  | 2.936729  |
| 26 | 0 | -0.029438 | 0.433720  | 0.610157  |

|   |   |           |           |           |
|---|---|-----------|-----------|-----------|
| 6 | 0 | -1.685630 | 1.357830  | -0.365938 |
| 6 | 0 | -1.253699 | 2.166705  | 0.726411  |
| 6 | 0 | -0.589987 | 1.251838  | -1.272119 |
| 6 | 0 | 0.093316  | 2.553435  | 0.491962  |
| 1 | 0 | -1.852910 | 2.431372  | 1.587317  |
| 6 | 0 | 0.504845  | 1.985457  | -0.743394 |
| 1 | 0 | -0.579362 | 0.658024  | -2.176659 |
| 1 | 0 | 0.705444  | 3.152004  | 1.152759  |
| 6 | 0 | 3.007291  | -0.600253 | 0.479952  |
| 6 | 0 | 3.676446  | 0.616037  | 0.693598  |
| 6 | 0 | 3.675856  | -1.597078 | -0.229063 |
| 6 | 0 | 4.960854  | 0.821642  | 0.218897  |
| 1 | 0 | 3.167265  | 1.416331  | 1.225350  |
| 6 | 0 | 4.968838  | -1.404885 | -0.721659 |
| 1 | 0 | 3.188064  | -2.554716 | -0.388168 |
| 6 | 0 | 5.616314  | -0.190336 | -0.494416 |
| 1 | 0 | 5.479262  | 1.761470  | 0.377615  |
| 1 | 0 | 5.454751  | -2.207918 | -1.262988 |
| 8 | 0 | 6.873177  | 0.105068  | -0.923399 |
| 6 | 0 | 7.563814  | -0.881616 | -1.659798 |
| 1 | 0 | 7.027326  | -1.136454 | -2.581845 |
| 1 | 0 | 8.531801  | -0.448802 | -1.910745 |
| 1 | 0 | 7.714461  | -1.789851 | -1.063392 |
| 1 | 0 | 1.493597  | 2.054106  | -1.177389 |
| 6 | 0 | -3.009631 | 0.722883  | -0.519080 |
| 6 | 0 | -3.730344 | 0.267710  | 0.585921  |
| 6 | 0 | -3.586448 | 0.566134  | -1.788256 |
| 6 | 0 | -4.987269 | -0.322996 | 0.449125  |
| 1 | 0 | -3.293162 | 0.356847  | 1.577675  |
| 6 | 0 | -4.830331 | -0.026003 | -1.944094 |
| 1 | 0 | -3.054410 | 0.928789  | -2.663343 |
| 6 | 0 | -5.540434 | -0.473016 | -0.824723 |
| 1 | 0 | -5.511931 | -0.664862 | 1.333412  |
| 1 | 0 | -5.280694 | -0.146709 | -2.923830 |
| 8 | 0 | -6.753038 | -1.037027 | -1.075624 |
| 6 | 0 | -7.497336 | -1.509019 | 0.026805  |
| 1 | 0 | -8.419315 | -1.919387 | -0.383835 |
| 1 | 0 | -6.955000 | -2.296610 | 0.563951  |
| 1 | 0 | -7.738734 | -0.694647 | 0.720827  |

**X) 4,4'-(Ferrocen-1,1'-diyl)dibenzaldehyde (unfolded)**

|    |   |           |           |           |
|----|---|-----------|-----------|-----------|
| 6  | 0 | 0.098237  | -1.049461 | 2.470791  |
| 6  | 0 | 0.545740  | 0.237391  | 2.067775  |
| 6  | 0 | -0.520357 | 0.877685  | 1.384799  |
| 6  | 0 | -1.634213 | -0.013713 | 1.354139  |
| 6  | 0 | -1.240954 | -1.207411 | 2.030551  |
| 1  | 0 | 0.685394  | -1.791702 | 2.993406  |
| 1  | 0 | 1.540408  | 0.638939  | 2.208838  |
| 1  | 0 | -0.479641 | 1.851653  | 0.914503  |
| 1  | 0 | -1.861051 | -2.081691 | 2.177062  |
| 26 | 0 | 0.020308  | -0.901396 | 0.348510  |
| 6  | 0 | 1.674466  | -1.019684 | -0.986964 |
| 6  | 0 | 1.309265  | -2.331695 | -0.564394 |
| 6  | 0 | 0.546351  | -0.459872 | -1.659363 |
| 6  | 0 | -0.028364 | -2.574982 | -0.971081 |
| 1  | 0 | 1.928290  | -2.999497 | 0.019998  |
| 6  | 0 | -0.498363 | -1.418569 | -1.650481 |
| 1  | 0 | 0.496803  | 0.529604  | -2.093720 |
| 1  | 0 | -0.600817 | -3.468390 | -0.762896 |

|   |   |           |           |           |
|---|---|-----------|-----------|-----------|
| 6 | 0 | -2.940980 | 0.240292  | 0.721050  |
| 6 | 0 | -3.693841 | -0.811364 | 0.180439  |
| 6 | 0 | -3.457922 | 1.544339  | 0.663275  |
| 6 | 0 | -4.931411 | -0.564365 | -0.400783 |
| 1 | 0 | -3.291833 | -1.820877 | 0.201424  |
| 6 | 0 | -4.689373 | 1.793957  | 0.074702  |
| 1 | 0 | -2.891603 | 2.359829  | 1.103162  |
| 6 | 0 | -5.434114 | 0.737846  | -0.459437 |
| 1 | 0 | -5.510468 | -1.383883 | -0.821108 |
| 1 | 0 | -5.099188 | 2.798472  | 0.026264  |
| 6 | 0 | -6.751387 | 0.989190  | -1.086963 |
| 8 | 0 | -7.261394 | 2.082473  | -1.189018 |
| 1 | 0 | -7.268503 | 0.087065  | -1.475361 |
| 1 | 0 | -1.490839 | -1.275716 | -2.056578 |
| 6 | 0 | 2.967808  | -0.353392 | -0.748036 |
| 6 | 0 | 4.147742  | -1.104194 | -0.685859 |
| 6 | 0 | 3.041449  | 1.041905  | -0.589597 |
| 6 | 0 | 5.370119  | -0.478038 | -0.463433 |
| 1 | 0 | 4.105182  | -2.179181 | -0.831801 |
| 6 | 0 | 4.259026  | 1.667844  | -0.375542 |
| 1 | 0 | 2.126432  | 1.627888  | -0.616166 |
| 6 | 0 | 5.432867  | 0.907187  | -0.308836 |
| 1 | 0 | 6.283882  | -1.066635 | -0.419644 |
| 1 | 0 | 4.327604  | 2.744246  | -0.248598 |
| 6 | 0 | 6.739085  | 1.563360  | -0.074311 |
| 8 | 0 | 6.885684  | 2.755236  | 0.080351  |
| 1 | 0 | 7.612347  | 0.878967  | -0.045355 |
